# Supplementary material for: In-House Filtration Efficiency Assessment of Vapor Hydrogen Peroxide Decontaminated Filtering Facepiece Respirators (FFRs)
Source: MDPI journal article supplement (doi:10.3390/ijerph18137169), 2021-07-04
Supplement: s1 [file s1]

**Supplementary Material 1:** The 3D digital design of the air duct is in STL format (the file will be submitted along with the manuscript in a single file).

**Supplementary Material 2.** Filtration efficiency (FE) comparison between 1 and 10 minutes sampling times for KN95 (n=5) and N95-8210 (n=5) FFRs.

| Particle size (µm) | FE of KN95 (standard error) |             | FE of KN95 FFR (standard error) |            |            |           |
|--------------------|-----------------------------|-------------|---------------------------------|------------|------------|-----------|
|                    | Sampling time (minutes)*    |             | Sampling time (minutes)*        |            |            |           |
|                    | 1                           | 10          | P-value**                       | 1          | 10         | P-value** |
| 0.3                | 99.4 (0.04)                 | 99.1 (0.04) | 0.757                           | 82.1 (0.9) | 80.2 (1.1) | 0.699     |
| 0.5                | 99.0 (0.07)                 | 99.4 (0.04) |                                 | 80.3 (1.6) | 83.4 (1.0) |           |
| 0.7                | 99.5 (0.26)                 | 99.1 (0.13) |                                 | 92.5 (0.5) | 94.3 (0.2) |           |
| 1                  | 99.7 (0.05)                 | 99.5 (0.05) |                                 | 93.2 (0.4) | 95.2 (0.3) |           |
| 2                  | 99.7 (0.06)                 | 99.7 (0.04) |                                 | 97.5 (0.3) | 98.5 (0.1) |           |
| 5                  | 99.8 (0.15)                 | 99.9 (0.11) |                                 | 99.2 (0.2) | 99.6 (0.4) |           |

\*The sample size for 1 minute and 10 minutes were 2.8 and 28 liters of air respectively.

\*\* Based on One Way Repeated Measures Analysis of Variance analysis.

**Supplementary Material 3:** The raw data of filtration efficiency (FE) of FFRs.

| Type: 3M-8210      |       |           |         | Date: 27/08/2020 |           |         |                |                    |          |                |
|--------------------|-------|-----------|---------|------------------|-----------|---------|----------------|--------------------|----------|----------------|
| Control            |       |           |         | KD               |           |         |                |                    |          |                |
| Particle Size (uM) | Mask# | Particle# | Average | Standrad error   | Particle# | Average | Standrad error | FE (Norm. to PC %) | Average% | Standrad error |
| 0.3                | 1     | 37791.0   | 35266.2 | 823.5            | 6560.0    | 7025.8  | 350.8          | 81.4               | 80.1     | 1.0            |
|                    | 2     | 37335.0   |         |                  | 7750.0    |         |                | 78.0               |          |                |
|                    | 3     | 35826.0   |         |                  | 8478.0    |         |                | 76.0               |          |                |
|                    | 4     | 33992.0   |         |                  | 6350.0    |         |                | 82.0               |          |                |
|                    | 5     | 33666.0   |         |                  | 5561.0    |         |                | 84.2               |          |                |
|                    | 6     | 32987.0   |         |                  | 5390.0    |         |                | 84.7               |          |                |
|                    | 7     |           |         |                  | 9601.0    |         |                | 72.8               |          |                |
|                    | 8     |           |         |                  | 6850.0    |         |                | 80.6               |          |                |
|                    | 9     |           |         |                  | 7081.0    |         |                | 79.9               |          |                |
|                    | 10    |           |         |                  | 6385.0    |         |                | 81.9               |          |                |
|                    | 11    |           |         |                  | 6443.0    |         |                | 81.7               |          |                |
|                    | 12    |           |         |                  | 7861.0    |         |                | 77.7               |          |                |
| 0.5                | 1     | 3729.0    | 3079.8  | 278.1            | 265.0     | 481.1   | 105.3          | 91.4               | 84.4     | 3.4            |
|                    | 2     | 3896.0    |         |                  | 1218.0    |         |                | 60.5               |          |                |
|                    | 3     | 3303.0    |         |                  | 378.0     |         |                | 87.7               |          |                |
|                    | 4     | 2855.0    |         |                  | 910.0     |         |                | 70.5               |          |                |
|                    | 5     | 2522.0    |         |                  | 220.0     |         |                | 92.9               |          |                |
|                    | 6     | 2174.0    |         |                  | 195.0     |         |                | 93.7               |          |                |
|                    | 7     |           |         |                  | 1083.0    |         |                | 64.8               |          |                |
|                    | 8     |           |         |                  | 265.0     |         |                | 91.4               |          |                |
|                    | 9     |           |         |                  | 269.0     |         |                | 91.3               |          |                |
|                    | 10    |           |         |                  | 325.0     |         |                | 89.4               |          |                |
|                    | 11    |           |         |                  | 335.0     |         |                | 89.1               |          |                |
|                    | 12    |           |         |                  | 310.0     |         |                | 89.9               |          |                |
| 0.7                | 1     | 153.0     | 130.7   | 11.7             | 15.0      | 13.1    | 1.7            | 88.5               | 90.0     | 1.3            |
|                    | 2     | 175.0     |         |                  | 25.0      |         |                | 80.9               |          |                |
|                    | 3     | 121.0     |         |                  | 15.0      |         |                | 88.5               |          |                |
|                    | 4     | 129.0     |         |                  | 13.0      |         |                | 90.1               |          |                |
|                    | 5     | 106.0     |         |                  | 7.0       |         |                | 94.6               |          |                |
|                    | 6     | 100.0     |         |                  | 13.0      |         |                | 90.1               |          |                |
|                    | 7     |           |         |                  | 22.0      |         |                | 83.2               |          |                |
|                    | 8     |           |         |                  | 5.0       |         |                | 96.2               |          |                |
|                    | 9     |           |         |                  | 12.0      |         |                | 90.8               |          |                |
|                    | 10    |           |         |                  | 6.0       |         |                | 95.4               |          |                |
|                    | 11    |           |         |                  | 10.0      |         |                | 92.3               |          |                |
|                    | 12    |           |         |                  | 14.0      |         |                | 89.3               |          |                |
| 1.0                | 1     | 280.0     | 276.5   | 13.6             | 23.0      | 19.6    | 2.2            | 91.7               | 92.9     | 0.8            |
|                    | 2     | 334.0     |         |                  | 33.0      |         |                | 88.1               |          |                |
|                    | 3     | 289.0     |         |                  | 20.0      |         |                | 92.8               |          |                |
|                    | 4     | 264.0     |         |                  | 22.0      |         |                | 92.0               |          |                |
|                    | 5     | 250.0     |         |                  | 12.0      |         |                | 95.7               |          |                |
|                    | 6     | 242.0     |         |                  | 13.0      |         |                | 95.3               |          |                |
|                    | 7     |           |         |                  | 22.0      |         |                | 92.0               |          |                |
|                    | 8     |           |         |                  | 7.0       |         |                | 97.5               |          |                |
|                    | 9     |           |         |                  | 20.0      |         |                | 92.8               |          |                |
|                    | 10    |           |         |                  | 18.0      |         |                | 93.5               |          |                |
|                    | 11    |           |         |                  | 14.0      |         |                | 94.9               |          |                |
|                    | 12    |           |         |                  | 31.0      |         |                | 88.8               |          |                |
| 2.0                | 1     | 138.0     | 145.0   | 6.7              | 2.0       | 4.4     | 0.7            | 98.6               | 97.0     | 0.5            |
|                    | 2     | 154.0     |         |                  | 5.0       |         |                | 96.6               |          |                |
|                    | 3     | 131.0     |         |                  | 7.0       |         |                | 95.2               |          |                |
|                    | 4     | 145.0     |         |                  | 5.0       |         |                | 96.6               |          |                |
|                    | 5     | 129.0     |         |                  | 7.0       |         |                | 95.2               |          |                |
|                    | 6     | 173.0     |         |                  | 6.0       |         |                | 95.9               |          |                |
|                    | 7     |           |         |                  | 4.0       |         |                | 97.2               |          |                |
|                    | 8     |           |         |                  | 1.0       |         |                | 99.3               |          |                |
|                    | 9     |           |         |                  | 1.0       |         |                | 99.3               |          |                |
|                    | 10    |           |         |                  | 7.0       |         |                | 95.2               |          |                |
|                    | 11    |           |         |                  | 2.0       |         |                | 98.6               |          |                |
|                    | 12    |           |         |                  | 6.0       |         |                | 95.9               |          |                |
| 5.0                | 1     | 65.0      | 60.5    | 1.8              | 1.0       | 0.4     | 0.2            | 98.3               | 99.3     | 0.3            |
|                    | 2     | 61.0      |         |                  | 0.0       |         |                | 100.0              |          |                |
|                    | 3     | 59.0      |         |                  | 0.0       |         |                | 100.0              |          |                |
|                    | 4     | 56.0      |         |                  | 0.0       |         |                | 100.0              |          |                |
|                    | 5     | 56.0      |         |                  | 2.0       |         |                | 96.7               |          |                |
|                    | 6     | 66.0      |         |                  | 0.0       |         |                | 100.0              |          |                |
|                    | 7     |           |         |                  | 1.0       |         |                | 98.3               |          |                |
|                    | 8     |           |         |                  | 0.0       |         |                | 100.0              |          |                |
|                    | 9     |           |         |                  | 0.0       |         |                | 100.0              |          |                |
|                    | 10    |           |         |                  | 1.0       |         |                | 98.3               |          |                |
|                    | 11    |           |         |                  | 0.0       |         |                | 100.0              |          |                |
|                    | 12    |           |         |                  | 0.0       |         |                | 100.0              |          |                |

|                         |       |           |         |                     |           |         |                   |                    |          |                   |
|-------------------------|-------|-----------|---------|---------------------|-----------|---------|-------------------|--------------------|----------|-------------------|
| Gerson 1730<br>N95 Mask |       |           |         | Date:<br>12/10/2020 |           |         |                   |                    |          |                   |
|                         |       | Control   |         |                     | KD        |         |                   |                    |          |                   |
| Particle Size<br>(µM)   | Mask# | Particle# | Average | Standrad<br>error   | Particle# | Average | Standrad<br>error | FE (Norm. to PC %) | Average% | Standrad<br>error |
| 0.3                     | 1     | 64874.0   | 64179.7 | 323.2               | 482.0     | 368.6   | 68.6              | 99.2               | 99.4     | 0.1               |
|                         | 2     | 63908.0   |         |                     | 285.0     |         |                   | 99.6               |          |                   |
|                         | 3     | 65191.0   |         |                     | 181.0     |         |                   | 99.7               |          |                   |
|                         | 4     | 64113.0   |         |                     | 332.0     |         |                   | 99.5               |          |                   |
|                         | 5     | 64051.0   |         |                     | 563.0     |         |                   | 99.1               |          |                   |
|                         | 6     | 62941.0   |         |                     |           |         |                   |                    |          |                   |
|                         | 7     |           |         |                     |           |         |                   |                    |          |                   |
|                         | 8     |           |         |                     |           |         |                   |                    |          |                   |
|                         | 9     |           |         |                     |           |         |                   |                    |          |                   |
|                         | 10    |           |         |                     |           |         |                   |                    |          |                   |
|                         | 11    |           |         |                     |           |         |                   |                    |          |                   |
|                         | 12    |           |         |                     |           |         |                   |                    |          |                   |
| 0.5                     | 1     | 4607.0    | 4497.7  | 38.6                | 29.0      | 37.8    | 6.5               | 99.4               | 99.2     | 0.1               |
|                         | 2     | 4516.0    |         |                     | 23.0      |         |                   | 99.5               |          |                   |
|                         | 3     | 4588.0    |         |                     | 41.0      |         |                   | 99.1               |          |                   |
|                         | 4     | 4383.0    |         |                     | 35.0      |         |                   | 99.2               |          |                   |
|                         | 5     | 4500.0    |         |                     | 61.0      |         |                   | 98.6               |          |                   |
|                         | 6     | 4392.0    |         |                     |           |         |                   |                    |          |                   |
|                         | 7     |           |         |                     |           |         |                   |                    |          |                   |
|                         | 8     |           |         |                     |           |         |                   |                    |          |                   |
|                         | 9     |           |         |                     |           |         |                   |                    |          |                   |
|                         | 10    |           |         |                     |           |         |                   |                    |          |                   |
|                         | 11    |           |         |                     |           |         |                   |                    |          |                   |
|                         | 12    |           |         |                     |           |         |                   |                    |          |                   |
| 0.7                     | 1     | 112.0     | 119.5   | 7.2                 | 0.0       | 0.4     | 0.2               | 100.0              | 99.7     | 0.2               |
|                         | 2     | 106.0     |         |                     | 1.0       |         |                   | 99.2               |          |                   |
|                         | 3     | 145.0     |         |                     | 0.0       |         |                   | 100.0              |          |                   |
|                         | 4     | 106.0     |         |                     | 0.0       |         |                   | 100.0              |          |                   |
|                         | 5     | 139.0     |         |                     | 1.0       |         |                   | 99.2               |          |                   |
|                         | 6     | 109.0     |         |                     |           |         |                   |                    |          |                   |
|                         | 7     |           |         |                     |           |         |                   |                    |          |                   |
|                         | 8     |           |         |                     |           |         |                   |                    |          |                   |
|                         | 9     |           |         |                     |           |         |                   |                    |          |                   |
|                         | 10    |           |         |                     |           |         |                   |                    |          |                   |
|                         | 11    |           |         |                     |           |         |                   |                    |          |                   |
|                         | 12    |           |         |                     |           |         |                   |                    |          |                   |
| 1.0                     | 1     | 276.0     | 260.2   | 4.7                 | 0.0       | 1.8     | 1.1               | 100.0              | 99.3     | 0.4               |
|                         | 2     | 268.0     |         |                     | 1.0       |         |                   | 99.6               |          |                   |
|                         | 3     | 260.0     |         |                     | 1.0       |         |                   | 99.6               |          |                   |
|                         | 4     | 260.0     |         |                     | 1.0       |         |                   | 99.6               |          |                   |
|                         | 5     | 242.0     |         |                     | 6.0       |         |                   | 97.7               |          |                   |
|                         | 6     | 255.0     |         |                     |           |         |                   |                    |          |                   |
|                         | 7     |           |         |                     |           |         |                   |                    |          |                   |
|                         | 8     |           |         |                     |           |         |                   |                    |          |                   |
|                         | 9     |           |         |                     |           |         |                   |                    |          |                   |
|                         | 10    |           |         |                     |           |         |                   |                    |          |                   |
|                         | 11    |           |         |                     |           |         |                   |                    |          |                   |
|                         | 12    |           |         |                     |           |         |                   |                    |          |                   |
| 2.0                     | 1     | 137.0     | 160.8   | 6.8                 | 0.0       | 0.8     | 0.6               | 100.0              | 99.5     | 0.4               |
|                         | 2     | 165.0     |         |                     | 1.0       |         |                   | 99.4               |          |                   |
|                         | 3     | 168.0     |         |                     | 0.0       |         |                   | 100.0              |          |                   |
|                         | 4     | 184.0     |         |                     | 0.0       |         |                   | 100.0              |          |                   |
|                         | 5     | 147.0     |         |                     | 3.0       |         |                   | 98.1               |          |                   |
|                         | 6     | 164.0     |         |                     |           |         |                   |                    |          |                   |
|                         | 7     |           |         |                     |           |         |                   |                    |          |                   |
|                         | 8     |           |         |                     |           |         |                   |                    |          |                   |
|                         | 9     |           |         |                     |           |         |                   |                    |          |                   |
|                         | 10    |           |         |                     |           |         |                   |                    |          |                   |
|                         | 11    |           |         |                     |           |         |                   |                    |          |                   |
|                         | 12    |           |         |                     |           |         |                   |                    |          |                   |
| 5.0                     | 1     | 37.0      | 42.0    | 1.7                 | 0.0       | 0.2     | 0.2               | 100.0              | 99.5     | 0.5               |
|                         | 2     | 39.0      |         |                     | 0.0       |         |                   | 100.0              |          |                   |
|                         | 3     | 40.0      |         |                     | 0.0       |         |                   | 100.0              |          |                   |
|                         | 4     | 48.0      |         |                     | 0.0       |         |                   | 100.0              |          |                   |
|                         | 5     | 45.0      |         |                     | 1.0       |         |                   | 97.6               |          |                   |
|                         | 6     | 43.0      |         |                     |           |         |                   |                    |          |                   |
|                         | 7     |           |         |                     |           |         |                   |                    |          |                   |
|                         | 8     |           |         |                     |           |         |                   |                    |          |                   |
|                         | 9     |           |         |                     |           |         |                   |                    |          |                   |
|                         | 10    |           |         |                     |           |         |                   |                    |          |                   |
|                         | 11    |           |         |                     |           |         |                   |                    |          |                   |
|                         | 12    |           |         |                     |           |         |                   |                    |          |                   |

|                              |       |           |         |                     |           |         |                |                    |          |                |
|------------------------------|-------|-----------|---------|---------------------|-----------|---------|----------------|--------------------|----------|----------------|
| Medline N95 Cone Style Masks |       |           |         | Date:<br>12/10/2020 |           |         |                |                    |          |                |
|                              |       | Control   |         |                     | KD        |         |                |                    |          |                |
| Particle Size (uM)           | Mask# | Particle# | Average | Standrad error      | Particle# | Average | Standrad error | FE (Norm. to PC %) | Average% | Standrad error |
| 0.3                          | 1     | 64874.0   | 64179.7 | 323.2               | 42.0      | 49.2    | 4.1            | 99.9               | 99.9     | 0.0            |
|                              | 2     | 63908.0   |         |                     | 53.0      |         |                | 99.9               |          |                |
|                              | 3     | 65191.0   |         |                     | 37.0      |         |                | 99.9               |          |                |
|                              | 4     | 64113.0   |         |                     | 58.0      |         |                | 99.9               |          |                |
|                              | 5     | 64051.0   |         |                     | 56.0      |         |                | 99.9               |          |                |
|                              | 6     | 62941.0   |         |                     |           |         |                |                    |          |                |
|                              | 7     |           |         |                     |           |         |                |                    |          |                |
|                              | 8     |           |         |                     |           |         |                |                    |          |                |
|                              | 9     |           |         |                     |           |         |                |                    |          |                |
|                              | 10    |           |         |                     |           |         |                |                    |          |                |
|                              | 11    |           |         |                     |           |         |                |                    |          |                |
|                              | 12    |           |         |                     |           |         |                |                    |          |                |
|                              |       |           |         |                     |           |         |                |                    |          |                |
| 0.5                          | 1     | 4607.0    | 4497.7  | 38.6                | 4.0       | 5.6     | 1.7            | 99.9               | 99.9     | 0.0            |
|                              | 2     | 4516.0    |         |                     | 11.0      |         |                | 99.8               |          |                |
|                              | 3     | 4588.0    |         |                     | 7.0       |         |                | 99.8               |          |                |
|                              | 4     | 4383.0    |         |                     | 5.0       |         |                | 99.9               |          |                |
|                              | 5     | 4500.0    |         |                     | 1.0       |         |                | 100.0              |          |                |
|                              | 6     | 4392.0    |         |                     |           |         |                |                    |          |                |
|                              | 7     |           |         |                     |           |         |                |                    |          |                |
|                              | 8     |           |         |                     |           |         |                |                    |          |                |
|                              | 9     |           |         |                     |           |         |                |                    |          |                |
|                              | 10    |           |         |                     |           |         |                |                    |          |                |
|                              | 11    |           |         |                     |           |         |                |                    |          |                |
|                              | 12    |           |         |                     |           |         |                |                    |          |                |
|                              |       |           |         |                     |           |         |                |                    |          |                |
| 0.7                          | 1     | 112.0     | 119.5   | 7.2                 | 1.0       | 0.6     | 0.2            | 99.2               | 99.5     | 0.2            |
|                              | 2     | 106.0     |         |                     | 0.0       |         |                | 100.0              |          |                |
|                              | 3     | 145.0     |         |                     | 1.0       |         |                | 99.2               |          |                |
|                              | 4     | 106.0     |         |                     | 1.0       |         |                | 99.2               |          |                |
|                              | 5     | 139.0     |         |                     | 0.0       |         |                | 100.0              |          |                |
|                              | 6     | 109.0     |         |                     |           |         |                |                    |          |                |
|                              | 7     |           |         |                     |           |         |                |                    |          |                |
|                              | 8     |           |         |                     |           |         |                |                    |          |                |
|                              | 9     |           |         |                     |           |         |                |                    |          |                |
|                              | 10    |           |         |                     |           |         |                |                    |          |                |
|                              | 11    |           |         |                     |           |         |                |                    |          |                |
|                              | 12    |           |         |                     |           |         |                |                    |          |                |
|                              |       |           |         |                     |           |         |                |                    |          |                |
| 1.0                          | 1     | 276.0     | 260.2   | 4.7                 | 1.0       | 1.6     | 0.4            | 99.6               | 99.4     | 0.2            |
|                              | 2     | 268.0     |         |                     | 1.0       |         |                | 99.6               |          |                |
|                              | 3     | 260.0     |         |                     | 2.0       |         |                | 99.2               |          |                |
|                              | 4     | 260.0     |         |                     | 3.0       |         |                | 98.8               |          |                |
|                              | 5     | 242.0     |         |                     | 1.0       |         |                | 99.6               |          |                |
|                              | 6     | 255.0     |         |                     |           |         |                |                    |          |                |
|                              | 7     |           |         |                     |           |         |                |                    |          |                |
|                              | 8     |           |         |                     |           |         |                |                    |          |                |
|                              | 9     |           |         |                     |           |         |                |                    |          |                |
|                              | 10    |           |         |                     |           |         |                |                    |          |                |
|                              | 11    |           |         |                     |           |         |                |                    |          |                |
|                              | 12    |           |         |                     |           |         |                |                    |          |                |
|                              |       |           |         |                     |           |         |                |                    |          |                |
| 2.0                          | 1     | 137.0     | 160.8   | 6.8                 | 3.0       | 3.0     | 0.8            | 98.1               | 98.1     | 0.5            |
|                              | 2     | 165.0     |         |                     | 5.0       |         |                | 96.9               |          |                |
|                              | 3     | 168.0     |         |                     | 0.0       |         |                | 100.0              |          |                |
|                              | 4     | 184.0     |         |                     | 4.0       |         |                | 97.5               |          |                |
|                              | 5     | 147.0     |         |                     | 3.0       |         |                | 98.1               |          |                |
|                              | 6     | 164.0     |         |                     |           |         |                |                    |          |                |
|                              | 7     |           |         |                     |           |         |                |                    |          |                |
|                              | 8     |           |         |                     |           |         |                |                    |          |                |
|                              | 9     |           |         |                     |           |         |                |                    |          |                |
|                              | 10    |           |         |                     |           |         |                |                    |          |                |
|                              | 11    |           |         |                     |           |         |                |                    |          |                |
|                              | 12    |           |         |                     |           |         |                |                    |          |                |
|                              |       |           |         |                     |           |         |                |                    |          |                |
| 5.0                          | 1     | 37.0      | 42.0    | 1.7                 | 0.0       | 0.8     | 0.6            | 100.0              | 98.1     | 1.4            |
|                              | 2     | 39.0      |         |                     | 0.0       |         |                | 100.0              |          |                |
|                              | 3     | 40.0      |         |                     | 0.0       |         |                | 100.0              |          |                |
|                              | 4     | 48.0      |         |                     | 3.0       |         |                | 92.9               |          |                |
|                              | 5     | 45.0      |         |                     | 1.0       |         |                | 97.6               |          |                |
|                              | 6     | 43.0      |         |                     |           |         |                |                    |          |                |
|                              | 7     |           |         |                     |           |         |                |                    |          |                |
|                              | 8     |           |         |                     |           |         |                |                    |          |                |
|                              | 9     |           |         |                     |           |         |                |                    |          |                |
|                              | 10    |           |         |                     |           |         |                |                    |          |                |
|                              | 11    |           |         |                     |           |         |                |                    |          |                |
|                              | 12    |           |         |                     |           |         |                |                    |          |                |

|                       |             |           |         |                     |           |         |                |                       |          |                |
|-----------------------|-------------|-----------|---------|---------------------|-----------|---------|----------------|-----------------------|----------|----------------|
| Benehal N95 mask      | Lot: Number |           |         | Date:<br>11/10/2020 |           |         |                |                       |          |                |
|                       |             | Control   |         |                     | KD        |         |                |                       |          |                |
| Particle Size<br>(µM) | Mask#       | Particle# | Average | Standrad error      | Particle# | Average | Standrad error | FE (Norm. to<br>PC %) | Average% | Standrad error |
| 0.3                   | 1           | 71471.0   | 69255.8 | 1163.7              | 10153.0   | 9571.8  | 2485.4         | 85.3                  | 86.2     | 3.6            |
|                       | 2           | 70682.0   |         |                     | 17767.0   |         |                | 74.3                  |          |                |
|                       | 3           | 68592.0   |         |                     | 8285.0    |         |                | 88.0                  |          |                |
|                       | 4           | 66278.0   |         |                     | 2198.0    |         |                | 96.8                  |          |                |
|                       | 5           |           |         |                     | 9456.0    |         |                | 86.3                  |          |                |
|                       | 6           |           |         |                     |           |         |                |                       |          |                |
|                       | 7           |           |         |                     |           |         |                |                       |          |                |
|                       | 8           |           |         |                     |           |         |                |                       |          |                |
|                       | 9           |           |         |                     |           |         |                |                       |          |                |
|                       | 10          |           |         |                     |           |         |                |                       |          |                |
|                       | 11          |           |         |                     |           |         |                |                       |          |                |
|                       | 12          |           |         |                     |           |         |                |                       |          |                |
| 0.5                   | 1           | 9392.0    | 8321.8  | 541.3               | 855.0     | 701.8   | 176.4          | 89.7                  | 91.6     | 2.1            |
|                       | 2           | 9029.0    |         |                     | 1238.0    |         |                | 85.1                  |          |                |
|                       | 3           | 7814.0    |         |                     | 596.0     |         |                | 92.8                  |          |                |
|                       | 4           | 7052.0    |         |                     | 155.0     |         |                | 98.1                  |          |                |
|                       | 5           |           |         |                     | 665.0     |         |                | 92.0                  |          |                |
|                       | 6           |           |         |                     |           |         |                |                       |          |                |
|                       | 7           |           |         |                     |           |         |                |                       |          |                |
|                       | 8           |           |         |                     |           |         |                |                       |          |                |
|                       | 9           |           |         |                     |           |         |                |                       |          |                |
|                       | 10          |           |         |                     |           |         |                |                       |          |                |
|                       | 11          |           |         |                     |           |         |                |                       |          |                |
|                       | 12          |           |         |                     |           |         |                |                       |          |                |
| 0.7                   | 1           | 359.0     | 303.0   | 30.2                | 23.0      | 25.6    | 3.6            | 92.4                  | 91.6     | 1.2            |
|                       | 2           | 340.0     |         |                     | 34.0      |         |                | 88.8                  |          |                |
|                       | 3           | 289.0     |         |                     | 16.0      |         |                | 94.7                  |          |                |
|                       | 4           | 224.0     |         |                     | 34.0      |         |                | 88.8                  |          |                |
|                       | 5           |           |         |                     | 21.0      |         |                | 93.1                  |          |                |
|                       | 6           |           |         |                     |           |         |                |                       |          |                |
|                       | 7           |           |         |                     |           |         |                |                       |          |                |
|                       | 8           |           |         |                     |           |         |                |                       |          |                |
|                       | 9           |           |         |                     |           |         |                |                       |          |                |
|                       | 10          |           |         |                     |           |         |                |                       |          |                |
|                       | 11          |           |         |                     |           |         |                |                       |          |                |
|                       | 12          |           |         |                     |           |         |                |                       |          |                |
| 1.0                   | 1           | 492.0     | 459.3   | 18.0                | 42.0      | 37.8    | 3.9            | 90.9                  | 91.8     | 0.9            |
|                       | 2           | 476.0     |         |                     | 25.0      |         |                | 94.6                  |          |                |
|                       | 3           | 460.0     |         |                     | 34.0      |         |                | 92.6                  |          |                |
|                       | 4           | 409.0     |         |                     | 40.0      |         |                | 91.3                  |          |                |
|                       | 5           |           |         |                     | 48.0      |         |                | 89.5                  |          |                |
|                       | 6           |           |         |                     |           |         |                |                       |          |                |
|                       | 7           |           |         |                     |           |         |                |                       |          |                |
|                       | 8           |           |         |                     |           |         |                |                       |          |                |
|                       | 9           |           |         |                     |           |         |                |                       |          |                |
|                       | 10          |           |         |                     |           |         |                |                       |          |                |
|                       | 11          |           |         |                     |           |         |                |                       |          |                |
|                       | 12          |           |         |                     |           |         |                |                       |          |                |
| 2.0                   | 1           | 164.0     | 201.8   | 15.4                | 15.0      | 15.4    | 3.5            | 92.6                  | 92.4     | 1.8            |
|                       | 2           | 239.0     |         |                     | 17.0      |         |                | 91.6                  |          |                |
|                       | 3           | 198.0     |         |                     | 13.0      |         |                | 93.6                  |          |                |
|                       | 4           | 206.0     |         |                     | 5.0       |         |                | 97.5                  |          |                |
|                       | 5           |           |         |                     | 27.0      |         |                | 86.6                  |          |                |
|                       | 6           |           |         |                     |           |         |                |                       |          |                |
|                       | 7           |           |         |                     |           |         |                |                       |          |                |
|                       | 8           |           |         |                     |           |         |                |                       |          |                |
|                       | 9           |           |         |                     |           |         |                |                       |          |                |
|                       | 10          |           |         |                     |           |         |                |                       |          |                |
|                       | 11          |           |         |                     |           |         |                |                       |          |                |
|                       | 12          |           |         |                     |           |         |                |                       |          |                |
| 5.0                   | 1           | 27.0      | 35.0    | 2.8                 | 1.0       | 2.0     | 0.4            | 97.1                  | 94.3     | 1.3            |
|                       | 2           | 35.0      |         |                     | 2.0       |         |                | 94.3                  |          |                |
|                       | 3           | 39.0      |         |                     | 3.0       |         |                | 91.4                  |          |                |
|                       | 4           | 39.0      |         |                     | 3.0       |         |                | 91.4                  |          |                |
|                       | 5           |           |         |                     | 1.0       |         |                | 97.1                  |          |                |
|                       | 6           |           |         |                     |           |         |                |                       |          |                |
|                       | 7           |           |         |                     |           |         |                |                       |          |                |
|                       | 8           |           |         |                     |           |         |                |                       |          |                |
|                       | 9           |           |         |                     |           |         |                |                       |          |                |
|                       | 10          |           |         |                     |           |         |                |                       |          |                |
|                       | 11          |           |         |                     |           |         |                |                       |          |                |
|                       | 12          |           |         |                     |           |         |                |                       |          |                |

|                                 |       |           |         |                     |           |         |                |                    |          |                |
|---------------------------------|-------|-----------|---------|---------------------|-----------|---------|----------------|--------------------|----------|----------------|
| N99/N95 SpectraShield Plus Mask |       |           |         | Date:<br>11/10/2020 |           |         |                |                    |          |                |
|                                 |       | Control   |         |                     | KD        |         |                |                    |          |                |
| Particle Size (uM)              | Mask# | Particle# | Average | Standrad error      | Particle# | Average | Standrad error | FE (Norm. to PC %) | Average% | Standrad error |
| 0.3                             | 1     | 71471.0   | 69255.8 | 1163.7              | 205.0     | 318.8   | 38.0           | 99.7               | 99.5     | 0.1            |
|                                 | 2     | 70682.0   |         |                     | 403.0     |         |                | 99.4               |          |                |
|                                 | 3     | 68592.0   |         |                     | 351.0     |         |                | 99.5               |          |                |
|                                 | 4     | 66278.0   |         |                     | 380.0     |         |                | 99.5               |          |                |
|                                 | 5     |           |         |                     | 255.0     |         |                | 99.6               |          |                |
|                                 | 6     |           |         |                     |           |         |                |                    |          |                |
|                                 | 7     |           |         |                     |           |         |                |                    |          |                |
|                                 | 8     |           |         |                     |           |         |                |                    |          |                |
|                                 | 9     |           |         |                     |           |         |                |                    |          |                |
|                                 | 10    |           |         |                     |           |         |                |                    |          |                |
|                                 | 11    |           |         |                     |           |         |                |                    |          |                |
|                                 | 12    |           |         |                     |           |         |                |                    |          |                |
| 0.5                             | 1     | 9392.0    | 8321.8  | 541.3               | 21.0      | 28.4    | 2.2            | 99.7               | 99.7     | 0.0            |
|                                 | 2     | 9029.0    |         |                     | 34.0      |         |                | 99.6               |          |                |
|                                 | 3     | 7814.0    |         |                     | 32.0      |         |                | 99.6               |          |                |
|                                 | 4     | 7052.0    |         |                     | 28.0      |         |                | 99.7               |          |                |
|                                 | 5     |           |         |                     | 27.0      |         |                | 99.7               |          |                |
|                                 | 6     |           |         |                     |           |         |                |                    |          |                |
|                                 | 7     |           |         |                     |           |         |                |                    |          |                |
|                                 | 8     |           |         |                     |           |         |                |                    |          |                |
|                                 | 9     |           |         |                     |           |         |                |                    |          |                |
|                                 | 10    |           |         |                     |           |         |                |                    |          |                |
|                                 | 11    |           |         |                     |           |         |                |                    |          |                |
|                                 | 12    |           |         |                     |           |         |                |                    |          |                |
| 0.7                             | 1     | 359.0     | 303.0   | 30.2                | 0.0       | 0.4     | 0.4            | 100.0              | 99.9     | 0.1            |
|                                 | 2     | 340.0     |         |                     | 2.0       |         |                | 99.3               |          |                |
|                                 | 3     | 289.0     |         |                     | 0.0       |         |                | 100.0              |          |                |
|                                 | 4     | 224.0     |         |                     | 0.0       |         |                | 100.0              |          |                |
|                                 | 5     |           |         |                     | 0.0       |         |                | 100.0              |          |                |
|                                 | 6     |           |         |                     |           |         |                |                    |          |                |
|                                 | 7     |           |         |                     |           |         |                |                    |          |                |
|                                 | 8     |           |         |                     |           |         |                |                    |          |                |
|                                 | 9     |           |         |                     |           |         |                |                    |          |                |
|                                 | 10    |           |         |                     |           |         |                |                    |          |                |
|                                 | 11    |           |         |                     |           |         |                |                    |          |                |
|                                 | 12    |           |         |                     |           |         |                |                    |          |                |
| 1.0                             | 1     | 492.0     | 459.3   | 18.0                | 2.0       | 1.6     | 0.4            | 99.6               | 99.7     | 0.1            |
|                                 | 2     | 476.0     |         |                     | 2.0       |         |                | 99.6               |          |                |
|                                 | 3     | 460.0     |         |                     | 2.0       |         |                | 99.6               |          |                |
|                                 | 4     | 409.0     |         |                     | 2.0       |         |                | 99.6               |          |                |
|                                 | 5     |           |         |                     | 0.0       |         |                | 100.0              |          |                |
|                                 | 6     |           |         |                     |           |         |                |                    |          |                |
|                                 | 7     |           |         |                     |           |         |                |                    |          |                |
|                                 | 8     |           |         |                     |           |         |                |                    |          |                |
|                                 | 9     |           |         |                     |           |         |                |                    |          |                |
|                                 | 10    |           |         |                     |           |         |                |                    |          |                |
|                                 | 11    |           |         |                     |           |         |                |                    |          |                |
|                                 | 12    |           |         |                     |           |         |                |                    |          |                |
| 2.0                             | 1     | 164.0     | 201.8   | 15.4                | 2.0       | 1.2     | 0.4            | 99.0               | 99.4     | 0.2            |
|                                 | 2     | 239.0     |         |                     | 0.0       |         |                | 100.0              |          |                |
|                                 | 3     | 198.0     |         |                     | 1.0       |         |                | 99.5               |          |                |
|                                 | 4     | 206.0     |         |                     | 2.0       |         |                | 99.0               |          |                |
|                                 | 5     |           |         |                     | 1.0       |         |                | 99.5               |          |                |
|                                 | 6     |           |         |                     |           |         |                |                    |          |                |
|                                 | 7     |           |         |                     |           |         |                |                    |          |                |
|                                 | 8     |           |         |                     |           |         |                |                    |          |                |
|                                 | 9     |           |         |                     |           |         |                |                    |          |                |
|                                 | 10    |           |         |                     |           |         |                |                    |          |                |
|                                 | 11    |           |         |                     |           |         |                |                    |          |                |
|                                 | 12    |           |         |                     |           |         |                |                    |          |                |
| 5.0                             | 1     | 27.0      | 35.0    | 2.8                 | 1.0       | 0.2     | 0.2            | 97.1               | 99.4     | 0.6            |
|                                 | 2     | 35.0      |         |                     | 0.0       |         |                | 100.0              |          |                |
|                                 | 3     | 39.0      |         |                     | 0.0       |         |                | 100.0              |          |                |
|                                 | 4     | 39.0      |         |                     | 0.0       |         |                | 100.0              |          |                |
|                                 | 5     |           |         |                     | 0.0       |         |                | 100.0              |          |                |
|                                 | 6     |           |         |                     |           |         |                |                    |          |                |
|                                 | 7     |           |         |                     |           |         |                |                    |          |                |
|                                 | 8     |           |         |                     |           |         |                |                    |          |                |
|                                 | 9     |           |         |                     |           |         |                |                    |          |                |
|                                 | 10    |           |         |                     |           |         |                |                    |          |                |
|                                 | 11    |           |         |                     |           |         |                |                    |          |                |
|                                 | 12    |           |         |                     |           |         |                |                    |          |                |

|                    |       |           |         |                     |           |         |                |                    |          |                |
|--------------------|-------|-----------|---------|---------------------|-----------|---------|----------------|--------------------|----------|----------------|
| KN95 (Duck shape)  |       |           |         | Date:<br>12/10/2020 |           |         |                |                    |          |                |
|                    |       | Control   |         |                     | KD        |         |                |                    |          |                |
| Particle Size (uM) | Mask# | Particle# | Average | Standrad error      | Particle# | Average | Standrad error | FE (Norm. to PC %) | Average% | Standrad error |
| 0.3                | 1     | 51219.0   | 49660.0 | 526.2               | 1086.0    | 675.6   | 197.9          | 97.8               | 98.6     | 0.4            |
|                    | 2     | 50338.0   |         |                     | 1045.0    |         |                | 97.9               |          |                |
|                    | 3     | 48366.0   |         |                     | 395.0     |         |                | 99.2               |          |                |
|                    | 4     | 49703.0   |         |                     | 797.0     |         |                | 98.4               |          |                |
|                    | 5     | 48674.0   |         |                     | 55.0      |         |                | 99.9               |          |                |
|                    | 6     |           |         |                     |           |         |                |                    |          |                |
|                    | 7     |           |         |                     |           |         |                |                    |          |                |
|                    | 8     |           |         |                     |           |         |                |                    |          |                |
|                    | 9     |           |         |                     |           |         |                |                    |          |                |
|                    | 10    |           |         |                     |           |         |                |                    |          |                |
|                    | 11    |           |         |                     |           |         |                |                    |          |                |
|                    | 12    |           |         |                     |           |         |                |                    |          |                |
| 0.5                | 1     | 5990.0    | 5647.4  | 127.8               | 103.0     | 49.2    | 16.7           | 98.2               | 99.1     | 0.3            |
|                    | 2     | 5924.0    |         |                     | 67.0      |         |                | 98.8               |          |                |
|                    | 3     | 5477.0    |         |                     | 19.0      |         |                | 99.7               |          |                |
|                    | 4     | 5461.0    |         |                     | 46.0      |         |                | 99.2               |          |                |
|                    | 5     | 5385.0    |         |                     | 11.0      |         |                | 99.8               |          |                |
|                    | 6     |           |         |                     |           |         |                |                    |          |                |
|                    | 7     |           |         |                     |           |         |                |                    |          |                |
|                    | 8     |           |         |                     |           |         |                |                    |          |                |
|                    | 9     |           |         |                     |           |         |                |                    |          |                |
|                    | 10    |           |         |                     |           |         |                |                    |          |                |
|                    | 11    |           |         |                     |           |         |                |                    |          |                |
|                    | 12    |           |         |                     |           |         |                |                    |          |                |
| 0.7                | 1     | 271.0     | 237.4   | 14.5                | 4.0       | 1.8     | 0.8            | 98.3               | 99.2     | 0.3            |
|                    | 2     | 219.0     |         |                     | 3.0       |         |                | 98.7               |          |                |
|                    | 3     | 225.0     |         |                     | 0.0       |         |                | 100.0              |          |                |
|                    | 4     | 272.0     |         |                     | 0.0       |         |                | 100.0              |          |                |
|                    | 5     | 200.0     |         |                     | 2.0       |         |                | 99.2               |          |                |
|                    | 6     |           |         |                     |           |         |                |                    |          |                |
|                    | 7     |           |         |                     |           |         |                |                    |          |                |
|                    | 8     |           |         |                     |           |         |                |                    |          |                |
|                    | 9     |           |         |                     |           |         |                |                    |          |                |
|                    | 10    |           |         |                     |           |         |                |                    |          |                |
|                    | 11    |           |         |                     |           |         |                |                    |          |                |
|                    | 12    |           |         |                     |           |         |                |                    |          |                |
| 1.0                | 1     | 360.0     | 363.4   | 4.0                 | 2.0       | 1.6     | 0.7            | 99.4               | 99.6     | 0.2            |
|                    | 2     | 375.0     |         |                     | 4.0       |         |                | 98.9               |          |                |
|                    | 3     | 351.0     |         |                     | 0.0       |         |                | 100.0              |          |                |
|                    | 4     | 363.0     |         |                     | 2.0       |         |                | 99.4               |          |                |
|                    | 5     | 368.0     |         |                     | 0.0       |         |                | 100.0              |          |                |
|                    | 6     |           |         |                     |           |         |                |                    |          |                |
|                    | 7     |           |         |                     |           |         |                |                    |          |                |
|                    | 8     |           |         |                     |           |         |                |                    |          |                |
|                    | 9     |           |         |                     |           |         |                |                    |          |                |
|                    | 10    |           |         |                     |           |         |                |                    |          |                |
|                    | 11    |           |         |                     |           |         |                |                    |          |                |
|                    | 12    |           |         |                     |           |         |                |                    |          |                |
| 2.0                | 1     | 138.0     | 122.8   | 5.2                 | 0.0       | 0.2     | 0.2            | 100.0              | 99.8     | 0.2            |
|                    | 2     | 123.0     |         |                     | 0.0       |         |                | 100.0              |          |                |
|                    | 3     | 127.0     |         |                     | 0.0       |         |                | 100.0              |          |                |
|                    | 4     | 106.0     |         |                     | 1.0       |         |                | 99.2               |          |                |
|                    | 5     | 120.0     |         |                     | 0.0       |         |                | 100.0              |          |                |
|                    | 6     |           |         |                     |           |         |                |                    |          |                |
|                    | 7     |           |         |                     |           |         |                |                    |          |                |
|                    | 8     |           |         |                     |           |         |                |                    |          |                |
|                    | 9     |           |         |                     |           |         |                |                    |          |                |
|                    | 10    |           |         |                     |           |         |                |                    |          |                |
|                    | 11    |           |         |                     |           |         |                |                    |          |                |
|                    | 12    |           |         |                     |           |         |                |                    |          |                |
| 5.0                | 1     | 17.0      | 19.2    | 1.5                 | 0.0       | 0.0     | 0.0            | 100.0              | 100.0    | 0.0            |
|                    | 2     | 19.0      |         |                     | 0.0       |         |                | 100.0              |          |                |
|                    | 3     | 23.0      |         |                     | 0.0       |         |                | 100.0              |          |                |
|                    | 4     | 15.0      |         |                     | 0.0       |         |                | 100.0              |          |                |
|                    | 5     | 22.0      |         |                     | 0.0       |         |                | 100.0              |          |                |
|                    | 6     |           |         |                     |           |         |                |                    |          |                |
|                    | 7     |           |         |                     |           |         |                |                    |          |                |
|                    | 8     |           |         |                     |           |         |                |                    |          |                |
|                    | 9     |           |         |                     |           |         |                |                    |          |                |
|                    | 10    |           |         |                     |           |         |                |                    |          |                |
|                    | 11    |           |         |                     |           |         |                |                    |          |                |
|                    | 12    |           |         |                     |           |         |                |                    |          |                |



**Supplementary Material 4:** The raw data of filtration efficiency (FE) stability of N95-8210 and KN95 masks following VHP-STERIS Sterilization Systems.

| Type: 3M-8210      |            |         |                |           |         |                |                       |          |                |            |         |                |           |         |                |                       |          |                |  |
|--------------------|------------|---------|----------------|-----------|---------|----------------|-----------------------|----------|----------------|------------|---------|----------------|-----------|---------|----------------|-----------------------|----------|----------------|--|
| Cycle 1            |            |         |                |           |         |                |                       |          |                | Cycle 2    |         |                |           |         |                |                       |          |                |  |
| Control            |            |         |                |           |         |                |                       |          |                | Control    |         |                |           |         |                |                       |          |                |  |
| KD                 |            |         |                |           |         |                |                       |          |                | KD         |         |                |           |         |                |                       |          |                |  |
| Particle Size (uM) | Particle # | Average | Standrad error | Particle# | Average | Standrad error | FE (Norm. to cycle 0) | Average% | Standrad error | Particle # | Average | Standrad error | Particle# | Average | Standrad error | FE (Norm. to cycle 0) | Average% | Standrad error |  |
| 0.3                | 35193.0    | 28993.0 | 1910.4         | 6553.0    | 6475.5  | 299.3          | 96.6                  | 97.0     | 1.3            | 20065.0    | 15862.9 | 492.3          | 4405.0    | 4023.8  | 341.7          | 90.2                  | 93.2     | 2.7            |  |
|                    | 34476.0    |         |                | 6501.0    |         |                | 96.9                  |          |                | 16317.0    |         |                | 4149.0    |         |                | 92.2                  |          |                |  |
|                    | 27402.0    |         |                | 6775.0    |         |                | 95.7                  |          |                | 15983.0    |         |                | 3486.0    |         |                | 97.4                  |          |                |  |
|                    | 26748.0    |         |                | 5453.0    |         |                | 101.4                 |          |                | 15327.0    |         |                | 3101.0    |         |                | 100.4                 |          |                |  |
|                    | 23924.0    |         |                | 6053.0    |         |                | 98.8                  |          |                | 15753.0    |         |                | 6120.0    |         |                | 76.7                  |          |                |  |
|                    | 26215.0    |         |                | 8277.0    |         |                | 89.2                  |          |                | 15267.0    |         |                | 3267.0    |         |                | 99.1                  |          |                |  |
|                    |            |         |                | 6275.0    |         |                | 97.8                  |          |                | 15035.0    |         |                | 2585.0    |         |                | 104.5                 |          |                |  |
|                    |            |         |                | 5933.0    |         |                | 99.3                  |          |                | 14731.0    |         |                | 3266.0    |         |                | 99.1                  |          |                |  |
|                    |            |         |                | 6579.0    |         |                | 96.5                  |          |                | 14890.0    |         |                | 3451.0    |         |                | 97.7                  |          |                |  |
|                    |            |         |                | 5553.0    |         |                | 100.9                 |          |                | 15261.0    |         |                | 3674.0    |         |                | 95.9                  |          |                |  |
|                    | 8571.0     | 87.9    |                | 4316.0    | 90.9    |                |                       |          |                |            |         |                |           |         |                |                       |          |                |  |
|                    | 5183.0     |         |                | 102.5     |         |                | 6466.0                | 74.0     |                |            |         |                |           |         |                |                       |          |                |  |
| 0.5                | 2250.0     | 1952.8  | 168.7          | 1271.0    | 459.8   | 77.6           | 41.4                  | 90.6     | 4.7            | 2454.0     | 1918.1  | 65.7           | 451.0     | 507.5   | 79.5           | 90.6                  | 87.1     | 4.9            |  |
|                    | 2024.0     |         |                | 478.0     |         |                | 89.5                  |          |                | 1836.0     |         |                | 446.0     |         |                | 90.9                  |          |                |  |
|                    | 1693.0     |         |                | 476.0     |         |                | 89.6                  |          |                | 2015.0     |         |                | 357.0     |         |                | 96.4                  |          |                |  |
|                    | 1646.0     |         |                | 306.0     |         |                | 99.9                  |          |                | 1932.0     |         |                | 327.0     |         |                | 98.3                  |          |                |  |
|                    | 1514.0     |         |                | 368.0     |         |                | 96.2                  |          |                | 1909.0     |         |                | 872.0     |         |                | 64.6                  |          |                |  |
|                    | 2590.0     |         |                | 468.0     |         |                | 90.1                  |          |                | 1905.0     |         |                | 900.0     |         |                | 62.9                  |          |                |  |
|                    |            |         |                | 344.0     |         |                | 97.6                  |          |                | 1845.0     |         |                | 135.0     |         |                | 110.1                 |          |                |  |
|                    |            |         |                | 307.0     |         |                | 99.9                  |          |                | 1716.0     |         |                | 357.0     |         |                | 96.4                  |          |                |  |
|                    |            |         |                | 468.0     |         |                | 90.1                  |          |                | 1749.0     |         |                | 320.0     |         |                | 98.7                  |          |                |  |
|                    |            |         |                | 213.0     |         |                | 105.6                 |          |                | 1820.0     |         |                | 388.0     |         |                | 94.5                  |          |                |  |
|                    | 378.0      | 95.5    |                | 506.0     | 87.2    |                |                       |          |                |            |         |                |           |         |                |                       |          |                |  |
|                    | 441.0      | 91.7    |                | 1031.0    | 54.8    |                |                       |          |                |            |         |                |           |         |                |                       |          |                |  |
| 0.7                | 133.0      | 118.8   | 9.6            | 25.0      | 16.3    | 2.0            | 87.7                  | 95.9     | 1.9            | 201.0      | 168.4   | 5.1            | 27.0      | 28.1    | 2.8            | 93.3                  | 92.6     | 1.9            |  |
|                    | 131.0      |         |                | 11.0      |         |                | 100.8                 |          |                | 172.0      |         |                | 32.0      |         |                | 90.0                  |          |                |  |
|                    | 91.0       |         |                | 15.0      |         |                | 97.1                  |          |                | 175.0      |         |                | 20.0      |         |                | 97.9                  |          |                |  |
|                    | 98.0       |         |                | 9.0       |         |                | 102.7                 |          |                | 164.0      |         |                | 46.0      |         |                | 80.8                  |          |                |  |
|                    | 108.0      |         |                | 13.0      |         |                | 99.0                  |          |                | 186.0      |         |                | 20.0      |         |                | 97.9                  |          |                |  |
|                    | 152.0      |         |                | 20.0      |         |                | 92.4                  |          |                | 161.0      |         |                | 22.0      |         |                | 96.6                  |          |                |  |
|                    |            |         |                | 16.0      |         |                | 96.2                  |          |                | 154.0      |         |                | 19.0      |         |                | 98.6                  |          |                |  |
|                    |            |         |                | 7.0       |         |                | 104.6                 |          |                | 144.0      |         |                | 20.0      |         |                | 97.9                  |          |                |  |
|                    |            |         |                | 23.0      |         |                | 89.6                  |          |                | 164.0      |         |                | 20.0      |         |                | 97.9                  |          |                |  |
|                    |            |         |                | 14.0      |         |                | 98.0                  |          |                | 163.0      |         |                | 30.0      |         |                | 91.3                  |          |                |  |
|                    | 30.0       | 83.1    |                | 36.0      | 87.4    |                |                       |          |                |            |         |                |           |         |                |                       |          |                |  |
|                    | 12.0       | 99.9    |                | 45.0      | 81.4    |                |                       |          |                |            |         |                |           |         |                |                       |          |                |  |
| 1.0                | 357.0      | 380.5   | 41.2           | 76.0      | 42.8    | 5.3            | 86.1                  | 95.5     | 1.5            | 605.0      | 531.9   | 15.9           | 78.0      | 62.4    | 5.4            | 91.9                  | 95.0     | 1.1            |  |
|                    | 343.0      |         |                | 35.0      |         |                | 97.7                  |          |                | 511.0      |         |                | 75.0      |         |                | 92.5                  |          |                |  |
|                    | 264.0      |         |                | 37.0      |         |                | 97.2                  |          |                | 618.0      |         |                | 53.0      |         |                | 96.9                  |          |                |  |
|                    | 328.0      |         |                | 26.0      |         |                | 100.3                 |          |                | 529.0      |         |                | 40.0      |         |                | 99.5                  |          |                |  |
|                    | 440.0      |         |                | 31.0      |         |                | 98.9                  |          |                | 568.0      |         |                | 34.0      |         |                | 100.8                 |          |                |  |
|                    | 551.0      |         |                | 42.0      |         |                | 95.8                  |          |                | 473.0      |         |                | 48.0      |         |                | 97.9                  |          |                |  |
|                    |            |         |                | 48.0      |         |                | 94.1                  |          |                | 528.0      |         |                | 85.0      |         |                | 90.4                  |          |                |  |
|                    |            |         |                | 32.0      |         |                | 98.6                  |          |                | 481.0      |         |                | 47.0      |         |                | 98.1                  |          |                |  |
|                    |            |         |                | 80.0      |         |                | 85.0                  |          |                | 486.0      |         |                | 52.0      |         |                | 97.1                  |          |                |  |
|                    |            |         |                | 27.0      |         |                | 100.0                 |          |                | 520.0      |         |                | 82.0      |         |                | 91.0                  |          |                |  |
|                    | 50.0       | 93.5    |                | 87.0      | 90.0    |                |                       |          |                |            |         |                |           |         |                |                       |          |                |  |
|                    | 29.0       | 99.4    |                | 68.0      | 93.9    |                |                       |          |                |            |         |                |           |         |                |                       |          |                |  |
| 2.0                | 357.0      | 380.5   | 41.2           | 22.0      | 16.2    | 2.2            | 97.1                  | 98.7     | 0.6            | 333.0      | 371.9   | 18.9           | 18.0      | 18.8    | 2.1            | 98.1                  | 97.9     | 0.6            |  |
|                    | 343.0      |         |                | 3.0       |         |                | 102.3                 |          |                | 407.0      |         |                | 31.0      |         |                | 94.5                  |          |                |  |
|                    | 264.0      |         |                | 19.0      |         |                | 97.9                  |          |                | 473.0      |         |                | 16.0      |         |                | 98.7                  |          |                |  |
|                    | 328.0      |         |                | 29.0      |         |                | 95.2                  |          |                | 399.0      |         |                | 9.0       |         |                | 100.6                 |          |                |  |
|                    | 440.0      |         |                | 22.0      |         |                | 97.1                  |          |                | 442.0      |         |                | 10.0      |         |                | 100.3                 |          |                |  |
|                    | 551.0      |         |                | 16.0      |         |                | 98.8                  |          |                | 399.0      |         |                | 20.0      |         |                | 97.5                  |          |                |  |
|                    |            |         |                | 11.0      |         |                | 100.1                 |          |                | 325.0      |         |                | 28.0      |         |                | 95.3                  |          |                |  |
|                    |            |         |                | 10.0      |         |                | 100.4                 |          |                | 326.0      |         |                | 14.0      |         |                | 99.2                  |          |                |  |
|                    |            |         |                | 8.0       |         |                | 100.9                 |          |                | 312.0      |         |                | 11.0      |         |                | 100.0                 |          |                |  |
|                    |            |         |                | 11.0      |         |                | 100.1                 |          |                | 303.0      |         |                | 20.0      |         |                | 97.5                  |          |                |  |
|                    | 22.0       | 97.1    |                | 23.0      | 96.7    |                |                       |          |                |            |         |                |           |         |                |                       |          |                |  |
|                    | 21.0       | 97.4    |                | 25.0      | 96.2    |                |                       |          |                |            |         |                |           |         |                |                       |          |                |  |
| 5.0                | 42.0       | 94.5    | 30.9           | 2.0       | 1.7     | 0.3            | 98.6                  | 98.9     | 0.4            | 38.0       | 68.7    | 5.9            | 2.0       | 1.0     | 0.2            | 97.8                  | 99.2     | 0.4            |  |
|                    | 48.0       |         |                | 0.0       |         |                | 100.7                 |          |                | 73.0       |         |                | 0.0       |         |                | 100.7                 |          |                |  |
|                    | 30.0       |         |                | 2.0       |         |                | 98.6                  |          |                | 106.0      |         |                | 2.0       |         |                | 97.8                  |          |                |  |
|                    | 65.0       |         |                | 1.0       |         |                | 99.6                  |          |                | 88.0       |         |                | 2.0       |         |                | 97.8                  |          |                |  |
|                    | 183.0      |         |                | 4.0       |         |                | 96.4                  |          |                | 69.0       |         |                | 0.0       |         |                | 100.7                 |          |                |  |
|                    | 199.0      |         |                | 1.0       |         |                | 99.6                  |          |                | 73.0       |         |                | 1.0       |         |                | 99.2                  |          |                |  |
|                    |            |         |                | 1.0       |         |                | 99.6                  |          |                | 59.0       |         |                | 1.0       |         |                | 99.2                  |          |                |  |
|                    |            |         |                | 1.0       |         |                | 99.6                  |          |                | 59.0       |         |                | 0.0       |         |                | 100.7                 |          |                |  |
|                    |            |         |                | 3.0       |         |                | 97.5                  |          |                | 55.0       |         |                | 1.0       |         |                | 99.2                  |          |                |  |
|                    |            |         |                | 1.0       |         |                | 99.6                  |          |                | 67.0       |         |                | 1.0       |         |                | 99.2                  |          |                |  |
|                    | 3.0        | 97.5    |                | 2.0       | 97.8    |                |                       |          |                |            |         |                |           |         |                |                       |          |                |  |
|                    | 1.0        | 99.6    |                | 0.0       | 100.7   |                |                       |          |                |            |         |                |           |         |                |                       |          |                |  |

[illegible]









| Mask Type:<br>KN95 |       |           | Date: 27/08/2020 |                |           |         |                |                         |          |                |
|--------------------|-------|-----------|------------------|----------------|-----------|---------|----------------|-------------------------|----------|----------------|
|                    |       | Cycle 0   |                  |                |           |         |                |                         |          |                |
|                    |       | Control   |                  |                | KD        |         |                |                         |          |                |
| Particle Size (uM) | Mask# | Particle# | Average          | Standrad error | Particle# | Average | Standrad error | FE (Norm. to control %) | Average% | Standrad error |
| 0.3                | 1.0   | 35193.0   | 28993.0          | 1910.4         | 153.0     | 267.1   | 32.0           | 99.5                    | 99.1     | 0.1            |
|                    | 2.0   | 34476.0   |                  |                | 551.0     |         |                | 98.1                    |          |                |
|                    | 3.0   | 27402.0   |                  |                | 228.0     |         |                | 99.2                    |          |                |
|                    | 4.0   | 26748.0   |                  |                | 140.0     |         |                | 99.5                    |          |                |
|                    | 5.0   | 23924.0   |                  |                | 231.0     |         |                | 99.2                    |          |                |
|                    | 6.0   | 26215.0   |                  |                | 350.0     |         |                | 98.8                    |          |                |
|                    | 7.0   |           |                  |                | 169.0     |         |                | 99.4                    |          |                |
|                    | 8.0   |           |                  |                | 295.0     |         |                | 99.0                    |          |                |
|                    | 9.0   |           |                  |                | 303.0     |         |                | 99.0                    |          |                |
|                    | 10.0  |           |                  |                | 300.0     |         |                | 99.0                    |          |                |
|                    | 11.0  |           |                  |                | 210.0     |         |                | 99.3                    |          |                |
|                    | 12.0  |           |                  |                | 275.0     |         |                | 99.1                    |          |                |
|                    |       |           |                  |                |           |         |                |                         |          |                |
| 0.5                | 1.0   | 2250.0    | 1952.8           | 168.7          | 4.0       | 12.3    | 1.5            | 99.8                    | 99.4     | 0.1            |
|                    | 2.0   | 2024.0    |                  |                | 17.0      |         |                | 99.1                    |          |                |
|                    | 3.0   | 1693.0    |                  |                | 4.0       |         |                | 99.8                    |          |                |
|                    | 4.0   | 1646.0    |                  |                | 7.0       |         |                | 99.6                    |          |                |
|                    | 5.0   | 1514.0    |                  |                | 15.0      |         |                | 99.2                    |          |                |
|                    | 6.0   | 2590.0    |                  |                | 18.0      |         |                | 99.1                    |          |                |
|                    | 7.0   |           |                  |                | 10.0      |         |                | 99.5                    |          |                |
|                    | 8.0   |           |                  |                | 15.0      |         |                | 99.2                    |          |                |
|                    | 9.0   |           |                  |                | 17.0      |         |                | 99.1                    |          |                |
|                    | 10.0  |           |                  |                | 14.0      |         |                | 99.3                    |          |                |
|                    | 11.0  |           |                  |                | 11.0      |         |                | 99.4                    |          |                |
|                    | 12.0  |           |                  |                | 16.0      |         |                | 99.2                    |          |                |
|                    |       |           |                  |                |           |         |                |                         |          |                |
| 0.7                | 1.0   | 133.0     | 118.8            | 9.6            | 1.0       | 0.5     | 0.2            | 99.2                    | 99.6     | 0.1            |
|                    | 2.0   | 131.0     |                  |                | 1.0       |         |                | 99.2                    |          |                |
|                    | 3.0   | 91.0      |                  |                | 0.0       |         |                | 100.0                   |          |                |
|                    | 4.0   | 98.0      |                  |                | 1.0       |         |                | 99.2                    |          |                |
|                    | 5.0   | 108.0     |                  |                | 0.0       |         |                | 100.0                   |          |                |
|                    | 6.0   | 152.0     |                  |                | 1.0       |         |                | 99.2                    |          |                |
|                    | 7.0   |           |                  |                | 0.0       |         |                | 100.0                   |          |                |
|                    | 8.0   |           |                  |                | 1.0       |         |                | 99.2                    |          |                |
|                    | 9.0   |           |                  |                | 0.0       |         |                | 100.0                   |          |                |
|                    | 10.0  |           |                  |                | 0.0       |         |                | 100.0                   |          |                |
|                    | 11.0  |           |                  |                | 0.0       |         |                | 100.0                   |          |                |
|                    | 12.0  |           |                  |                | 1.0       |         |                | 99.2                    |          |                |
|                    |       |           |                  |                |           |         |                |                         |          |                |
| 1.0                | 1.0   | 357.0     | 380.5            | 41.2           | 1.0       | 2.3     | 0.4            | 99.7                    | 99.4     | 0.1            |
|                    | 2.0   | 343.0     |                  |                | 2.0       |         |                | 99.5                    |          |                |
|                    | 3.0   | 264.0     |                  |                | 2.0       |         |                | 99.5                    |          |                |
|                    | 4.0   | 328.0     |                  |                | 1.0       |         |                | 99.7                    |          |                |
|                    | 5.0   | 440.0     |                  |                | 1.0       |         |                | 99.7                    |          |                |
|                    | 6.0   | 551.0     |                  |                | 1.0       |         |                | 99.7                    |          |                |
|                    | 7.0   |           |                  |                | 4.0       |         |                | 98.9                    |          |                |
|                    | 8.0   |           |                  |                | 2.0       |         |                | 99.5                    |          |                |
|                    | 9.0   |           |                  |                | 4.0       |         |                | 98.9                    |          |                |
|                    | 10.0  |           |                  |                | 2.0       |         |                | 99.5                    |          |                |
|                    | 11.0  |           |                  |                | 3.0       |         |                | 99.2                    |          |                |
|                    | 12.0  |           |                  |                | 4.0       |         |                | 98.9                    |          |                |
|                    |       |           |                  |                |           |         |                |                         |          |                |
| 2.0                | 1.0   | 223.0     | 329.8            | 78.5           | 0.0       | 1.3     | 0.5            | 100.0                   | 99.6     | 0.1            |
|                    | 2.0   | 185.0     |                  |                | 2.0       |         |                | 99.4                    |          |                |
|                    | 3.0   | 173.0     |                  |                | 1.0       |         |                | 99.7                    |          |                |
|                    | 4.0   | 264.0     |                  |                | 1.0       |         |                | 99.7                    |          |                |
|                    | 5.0   | 492.0     |                  |                | 3.0       |         |                | 99.1                    |          |                |
|                    | 6.0   | 642.0     |                  |                | 1.0       |         |                | 99.7                    |          |                |
|                    | 7.0   |           |                  |                | 0.0       |         |                | 100.0                   |          |                |
|                    | 8.0   |           |                  |                | 3.0       |         |                | 99.1                    |          |                |
|                    | 9.0   |           |                  |                | 5.0       |         |                | 98.5                    |          |                |
|                    | 10.0  |           |                  |                | 0.0       |         |                | 100.0                   |          |                |
|                    | 11.0  |           |                  |                | 0.0       |         |                | 100.0                   |          |                |
|                    | 12.0  |           |                  |                | 0.0       |         |                | 100.0                   |          |                |
|                    |       |           |                  |                |           |         |                |                         |          |                |
| 5.0                | 1.0   | 42.0      | 94.5             | 30.9           | 0.0       | 0.1     | 0.1            | 100.0                   | 99.9     | 0.1            |
|                    | 2.0   | 48.0      |                  |                | 0.0       |         |                | 100.0                   |          |                |
|                    | 3.0   | 30.0      |                  |                | 0.0       |         |                | 100.0                   |          |                |
|                    | 4.0   | 65.0      |                  |                | 0.0       |         |                | 100.0                   |          |                |
|                    | 5.0   | 183.0     |                  |                | 0.0       |         |                | 100.0                   |          |                |
|                    | 6.0   | 199.0     |                  |                | 0.0       |         |                | 100.0                   |          |                |
|                    | 7.0   |           |                  |                | 0.0       |         |                | 100.0                   |          |                |
|                    | 8.0   |           |                  |                | 0.0       |         |                | 100.0                   |          |                |
|                    | 9.0   |           |                  |                | 1.0       |         |                | 98.9                    |          |                |
|                    | 10.0  |           |                  |                | 0.0       |         |                | 100.0                   |          |                |
|                    | 11.0  |           |                  |                | 0.0       |         |                | 100.0                   |          |                |
|                    | 12.0  |           |                  |                | 0.0       |         |                | 100.0                   |          |                |

| Mask<br>Type:<br>KN95 | Cycle 1            |            |         |                |            |         |                |                       |           | Cycle 2        |            |         |                |            |         |                |                       |          |                |       |
|-----------------------|--------------------|------------|---------|----------------|------------|---------|----------------|-----------------------|-----------|----------------|------------|---------|----------------|------------|---------|----------------|-----------------------|----------|----------------|-------|
|                       | Control            |            |         |                | KD         |         |                |                       |           | Control        |            |         |                | KD         |         |                |                       |          |                |       |
|                       | Particle Size (uM) | Particle # | Average | Standard error | Particle # | Average | Standard error | FE (Norm. to cycle 0) | Average % | Standard error | Particle # | Average | Standard error | Particle # | Average | Standard error | FE (Norm. to cycle 0) | Average% | Standard error |       |
| 0.3                   | 32410.0            | 30106.3    | 1279.7  | 322.0          | 339.4      | 43.9    | 99.8           | 99.8                  | 0.1       | 20065.0        | 15862.9    | 492.3   | 19.0           | 26.6       | 4.6     | 100.8          | 100.7                 | 0.0      |                |       |
|                       | 27668.0            |            |         |                |            |         |                |                       |           | 16317.0        |            |         |                |            |         |                |                       |          | 26.0           | 100.7 |
|                       | 26065.0            |            |         |                |            |         |                |                       |           | 15983.0        |            |         |                |            |         |                |                       |          | 21.0           | 100.8 |
|                       | 34687.0            |            |         |                |            |         |                |                       |           | 15327.0        |            |         |                |            |         |                |                       |          | 35.0           | 100.7 |
|                       | 30392.0            |            |         |                |            |         |                |                       |           | 15753.0        |            |         |                |            |         |                |                       |          | 46.0           | 100.6 |
|                       | 29416.0            |            |         |                |            |         |                |                       |           | 15267.0        |            |         |                |            |         |                |                       |          | 65.0           | 100.5 |
|                       |                    |            |         |                |            |         |                |                       |           | 15035.0        |            |         |                |            |         |                |                       |          | 14.0           | 100.8 |
|                       |                    |            |         |                |            |         |                |                       |           | 14731.0        |            |         |                |            |         |                |                       |          | 10.0           | 100.8 |
|                       |                    |            |         |                |            |         |                |                       |           | 14890.0        |            |         |                |            |         |                |                       |          | 21.0           | 100.8 |
|                       |                    |            |         |                |            |         |                |                       |           | 15261.0        |            |         |                |            |         |                |                       |          | 31.0           | 100.7 |
|                       |                    |            |         |                |            |         |                |                       |           |                |            |         |                |            |         |                |                       |          | 15.0           | 100.8 |
|                       |                    |            |         |                |            |         |                |                       |           |                |            |         |                |            |         |                |                       |          | 16.0           | 100.8 |
|                       | 0.5                |            |         |                |            |         |                |                       |           | 1978.0         |            |         |                |            |         |                |                       |          | 2153.0         | 280.1 |
| 1466.0                |                    | 1836.0     | 0.0     | 100.6          |            |         |                |                       |           |                |            |         |                |            |         |                |                       |          |                |       |
| 1367.0                |                    | 2015.0     | 3.0     | 100.4          |            |         |                |                       |           |                |            |         |                |            |         |                |                       |          |                |       |
| 3108.0                |                    | 1932.0     | 4.0     | 100.4          |            |         |                |                       |           |                |            |         |                |            |         |                |                       |          |                |       |
| 2701.0                |                    | 1909.0     | 11.0    | 100.0          |            |         |                |                       |           |                |            |         |                |            |         |                |                       |          |                |       |
| 2298.0                |                    | 1905.0     | 11.0    | 100.0          |            |         |                |                       |           |                |            |         |                |            |         |                |                       |          |                |       |
|                       |                    | 1845.0     | 1.0     | 100.6          |            |         |                |                       |           |                |            |         |                |            |         |                |                       |          |                |       |
|                       |                    | 1716.0     | 2.0     | 100.5          |            |         |                |                       |           |                |            |         |                |            |         |                |                       |          |                |       |
|                       |                    | 1749.0     | 14.0    | 99.9           |            |         |                |                       |           |                |            |         |                |            |         |                |                       |          |                |       |
|                       |                    | 1820.0     | 3.0     | 100.4          |            |         |                |                       |           |                |            |         |                |            |         |                |                       |          |                |       |
|                       |                    |            | 0.0     | 100.6          |            |         |                |                       |           |                |            |         |                |            |         |                |                       |          |                |       |
|                       |                    |            | 1.0     | 100.6          |            |         |                |                       |           |                |            |         |                |            |         |                |                       |          |                |       |
| 0.7                   |                    | 120.0      | 102.2   | 5.0            | 1.0        | 0.8     | 0.4            | 99.6                  | 99.6      | 0.4            | 201.0      | 168.4   | 5.1            | 0.0        | 0.2     | 0.1            | 100.4                 | 100.3    |                |       |
|                       | 83.0               | 172.0      |         |                |            |         |                |                       |           |                | 1.0        |         |                |            |         |                |                       |          | 99.8           |       |
|                       | 101.0              | 175.0      |         |                |            |         |                |                       |           |                | 0.0        |         |                |            |         |                |                       |          | 100.4          |       |
|                       | 106.0              | 164.0      |         |                |            |         |                |                       |           |                | 1.0        |         |                |            |         |                |                       |          | 99.8           |       |
|                       | 106.0              | 186.0      |         |                |            |         |                |                       |           |                | 0.0        |         |                |            |         |                |                       |          | 100.4          |       |
|                       | 97.0               | 161.0      |         |                |            |         |                |                       |           |                | 0.0        |         |                |            |         |                |                       |          | 100.4          |       |
|                       |                    | 154.0      |         |                |            |         |                |                       |           |                | 0.0        |         |                |            |         |                |                       |          | 100.4          |       |
|                       |                    | 144.0      |         |                |            |         |                |                       |           |                | 0.0        |         |                |            |         |                |                       |          | 100.4          |       |
|                       |                    | 164.0      |         |                |            |         |                |                       |           |                | 0.0        |         |                |            |         |                |                       |          | 100.4          |       |
|                       |                    | 163.0      |         |                |            |         |                |                       |           |                | 0.0        |         |                |            |         |                |                       |          | 100.4          |       |
|                       |                    |            |         |                |            |         |                |                       |           |                | 0.0        |         |                |            |         |                |                       |          | 100.4          |       |
|                       |                    |            |         |                |            |         |                |                       |           |                | 0.0        |         |                |            |         |                |                       |          | 100.4          |       |
|                       | 1.0                | 406.0      |         |                |            |         |                |                       |           |                | 324.3      |         |                |            |         |                |                       |          | 18.7           | 0.0   |
| 281.0                 |                    | 511.0      | 0.0     | 100.6          |            |         |                |                       |           |                |            |         |                |            |         |                |                       |          |                |       |
| 288.0                 |                    | 618.0      | 1.0     | 100.4          |            |         |                |                       |           |                |            |         |                |            |         |                |                       |          |                |       |
| 337.0                 |                    | 529.0      | 0.0     | 100.6          |            |         |                |                       |           |                |            |         |                |            |         |                |                       |          |                |       |
| 330.0                 |                    | 568.0      | 0.0     | 100.6          |            |         |                |                       |           |                |            |         |                |            |         |                |                       |          |                |       |
| 304.0                 |                    | 473.0      | 1.0     | 100.4          |            |         |                |                       |           |                |            |         |                |            |         |                |                       |          |                |       |
|                       |                    | 528.0      | 0.0     | 100.6          |            |         |                |                       |           |                |            |         |                |            |         |                |                       |          |                |       |
|                       |                    | 481.0      | 0.0     | 100.6          |            |         |                |                       |           |                |            |         |                |            |         |                |                       |          |                |       |
|                       |                    | 486.0      | 1.0     | 100.4          |            |         |                |                       |           |                |            |         |                |            |         |                |                       |          |                |       |
|                       |                    | 520.0      | 0.0     | 100.6          |            |         |                |                       |           |                |            |         |                |            |         |                |                       |          |                |       |
|                       |                    |            | 0.0     | 100.6          |            |         |                |                       |           |                |            |         |                |            |         |                |                       |          |                |       |
|                       |                    |            | 0.0     | 100.6          |            |         |                |                       |           |                |            |         |                |            |         |                |                       |          |                |       |
| 2.0                   |                    | 420.0      | 320.7   | 23.1           | 1.0        | 2.1     | 0.5            | 99.7                  | 99.7      | 0.2            |            | 333.0   | 371.9          | 18.9       | 1.0     | 0.3            | 0.2                   | 100.1    |                |       |
|                       | 251.0              | 407.0      |         |                |            |         |                |                       |           |                | 0.0        | 100.4   |                |            |         |                |                       |          |                |       |
|                       | 338.0              | 473.0      |         |                |            |         |                |                       |           |                | 0.0        | 100.4   |                |            |         |                |                       |          |                |       |
|                       | 301.0              | 399.0      |         |                |            |         |                |                       |           |                | 0.0        | 100.4   |                |            |         |                |                       |          |                |       |
|                       | 316.0              | 442.0      |         |                |            |         |                |                       |           |                | 1.0        | 100.1   |                |            |         |                |                       |          |                |       |
|                       | 298.0              | 399.0      |         |                |            |         |                |                       |           |                | 0.0        | 100.4   |                |            |         |                |                       |          |                |       |
|                       |                    | 325.0      |         |                |            |         |                |                       |           |                | 0.0        | 100.4   |                |            |         |                |                       |          |                |       |
|                       |                    | 326.0      |         |                |            |         |                |                       |           |                | 0.0        | 100.4   |                |            |         |                |                       |          |                |       |
|                       |                    | 312.0      |         |                |            |         |                |                       |           |                | 2.0        | 99.9    |                |            |         |                |                       |          |                |       |
|                       |                    | 303.0      |         |                |            |         |                |                       |           |                | 0.0        | 100.4   |                |            |         |                |                       |          |                |       |
|                       |                    |            |         |                |            |         |                |                       |           |                | 0.0        | 100.4   |                |            |         |                |                       |          |                |       |
|                       |                    |            |         |                |            |         |                |                       |           |                | 0.0        | 100.4   |                |            |         |                |                       |          |                |       |
|                       | 5.0                | 127.0      |         |                |            |         |                |                       |           |                | 91.3       | 7.8     |                |            |         |                |                       |          | 0.0            | 0.8   |
| 69.0                  |                    | 73.0       | 0.0     | 100.1          |            |         |                |                       |           |                |            |         |                |            |         |                |                       |          |                |       |
| 91.0                  |                    | 106.0      | 0.0     | 100.1          |            |         |                |                       |           |                |            |         |                |            |         |                |                       |          |                |       |
| 88.0                  |                    | 88.0       | 0.0     | 100.1          |            |         |                |                       |           |                |            |         |                |            |         |                |                       |          |                |       |
| 84.0                  |                    | 69.0       | 0.0     | 100.1          |            |         |                |                       |           |                |            |         |                |            |         |                |                       |          |                |       |
| 89.0                  |                    | 73.0       | 0.0     | 100.1          |            |         |                |                       |           |                |            |         |                |            |         |                |                       |          |                |       |
|                       |                    | 59.0       | 0.0     | 100.1          |            |         |                |                       |           |                |            |         |                |            |         |                |                       |          |                |       |
|                       |                    | 59.0       | 0.0     | 100.1          |            |         |                |                       |           |                |            |         |                |            |         |                |                       |          |                |       |
|                       |                    | 55.0       | 1.0     | 98.6           |            |         |                |                       |           |                |            |         |                |            |         |                |                       |          |                |       |
|                       |                    | 67.0       | 0.0     | 100.1          |            |         |                |                       |           |                |            |         |                |            |         |                |                       |          |                |       |
|                       |                    |            | 0.0     | 100.1          |            |         |                |                       |           |                |            |         |                |            |         |                |                       |          |                |       |
|                       |                    |            | 0.0     | 100.1          |            |         |                |                       |           |                |            |         |                |            |         |                |                       |          |                |       |
|                       |                    |            | 0.0     | 100.1          |            |         |                |                       |           |                |            |         |                |            |         |                |                       |          |                |       |



| Mask Type:<br>KN95 | Cycle 3            |            |         |                |            |         |                |                       |           | Cycle 4        |            |         |                |            |         |                |                       |           |                |
|--------------------|--------------------|------------|---------|----------------|------------|---------|----------------|-----------------------|-----------|----------------|------------|---------|----------------|------------|---------|----------------|-----------------------|-----------|----------------|
|                    | Control            |            |         |                | KD         |         |                |                       |           | Control        |            |         |                | KD         |         |                |                       |           |                |
|                    | Particle Size (uM) | Particle # | Average | Standard error | Particle # | Average | Standard error | FE (Norm. to cycle 0) | Average % | Standard error | Particle # | Average | Standard error | Particle # | Average | Standard error | FE (Norm. to cycle 0) | Average % | Standard error |
| 0.3                | 14207.0            | 13726.3    | 199.0   |                | 38.0       | 25.6    | 5.0            | 100.6                 | 100.7     | 0.0            | 24952.0    | 24188.3 | 1478.1         | 36.0       | 57.3    | 10.6           | 100.8                 | 100.7     | 0.0            |
|                    | 13596.0            |            |         |                | 4.0        |         |                | 100.9                 |           |                | 123.0      |         |                | 100.4      |         |                |                       |           |                |
|                    | 13012.0            |            |         |                | 17.0       |         |                | 100.8                 |           |                | 110.0      |         |                | 100.4      |         |                |                       |           |                |
|                    | 13852.0            |            |         |                | 57.0       |         |                | 100.5                 |           |                | 97.0       |         |                | 100.5      |         |                |                       |           |                |
|                    | 13483.0            |            |         |                | 4.0        |         |                | 100.9                 |           |                | 21.0       |         |                | 100.8      |         |                |                       |           |                |
|                    | 13084.0            |            |         |                | 8.0        |         |                | 100.8                 |           |                | 31.0       |         |                | 100.8      |         |                |                       |           |                |
|                    | 13685.0            |            |         |                | 15.0       |         |                | 100.8                 |           |                | 26.0       |         |                | 100.8      |         |                |                       |           |                |
|                    | 13367.0            |            |         |                | 25.0       |         |                | 100.7                 |           |                | 20.0       |         |                | 100.8      |         |                |                       |           |                |
|                    | 13773.0            |            |         |                | 44.0       |         |                | 100.6                 |           |                | 41.0       |         |                | 100.7      |         |                |                       |           |                |
|                    | 15204.0            |            |         |                | 45.0       |         |                | 100.6                 |           |                | 38.0       |         |                | 100.7      |         |                |                       |           |                |
|                    |                    |            |         |                | 23.0       |         |                | 100.7                 |           |                | 64.0       |         |                | 100.6      |         |                |                       |           |                |
|                    |                    |            |         |                | 27.0       |         |                | 100.7                 |           |                | 81.0       |         |                | 100.6      |         |                |                       |           |                |
| 0.5                | 1591.0             | 1491.7     | 45.4    |                | 2.0        | 2.8     | 0.8            | 100.5                 | 100.4     | 0.1            | 1475.0     | 1651.4  | 158.3          | 1.0        | 4.2     | 1.0            | 100.5                 | 100.3     | 0.1            |
|                    | 1543.0             |            |         |                | 0.0        |         |                | 100.6                 |           |                | 7.0        |         |                | 100.2      |         |                |                       |           |                |
|                    | 1419.0             |            |         |                | 0.0        |         |                | 100.6                 |           |                | 9.0        |         |                | 100.1      |         |                |                       |           |                |
|                    | 1501.0             |            |         |                | 7.0        |         |                | 100.1                 |           |                | 8.0        |         |                | 100.1      |         |                |                       |           |                |
|                    | 1426.0             |            |         |                | 0.0        |         |                | 100.6                 |           |                | 2.0        |         |                | 100.5      |         |                |                       |           |                |
|                    | 1372.0             |            |         |                | 3.0        |         |                | 100.4                 |           |                | 1.0        |         |                | 100.5      |         |                |                       |           |                |
|                    | 1371.0             |            |         |                | 2.0        |         |                | 100.5                 |           |                | 3.0        |         |                | 100.4      |         |                |                       |           |                |
|                    | 1392.0             |            |         |                | 0.0        |         |                | 100.6                 |           |                | 0.0        |         |                | 100.6      |         |                |                       |           |                |
|                    | 1459.0             |            |         |                | 4.0        |         |                | 100.3                 |           |                | 1.0        |         |                | 100.5      |         |                |                       |           |                |
|                    | 1843.0             |            |         |                | 8.0        |         |                | 100.1                 |           |                | 7.0        |         |                | 100.2      |         |                |                       |           |                |
|                    |                    |            |         |                | 2.0        |         |                | 100.5                 |           |                | 3.0        |         |                | 100.4      |         |                |                       |           |                |
|                    |                    |            |         |                | 5.0        |         |                | 100.3                 |           |                | 8.0        |         |                | 100.1      |         |                |                       |           |                |
| 0.7                | 136.0              | 102.5      | 4.8     |                | 0.0        | 0.3     | 0.3            | 100.4                 | 100.1     | 0.3            | 100.0      | 101.1   | 8.0            | 0.0        | 0.2     | 0.1            | 100.4                 | 100.2     | 0.1            |
|                    | 94.0               |            |         |                | 1.0        |         |                | 99.4                  |           |                | 0.0        |         |                | 100.4      |         |                |                       |           |                |
|                    | 98.0               |            |         |                | 0.0        |         |                | 100.4                 |           |                | 110.0      |         |                | 100.4      |         |                |                       |           |                |
|                    | 111.0              |            |         |                | 0.0        |         |                | 100.4                 |           |                | 96.0       |         |                | 1.0        |         |                | 99.4                  |           |                |
|                    | 93.0               |            |         |                | 0.0        |         |                | 100.4                 |           |                | 88.0       |         |                | 0.0        |         |                | 100.4                 |           |                |
|                    | 96.0               |            |         |                | 0.0        |         |                | 100.4                 |           |                | 86.0       |         |                | 1.0        |         |                | 99.4                  |           |                |
|                    | 83.0               |            |         |                | 0.0        |         |                | 100.4                 |           |                | 152.0      |         |                | 0.0        |         |                | 100.4                 |           |                |
|                    | 92.0               |            |         |                | 0.0        |         |                | 100.4                 |           |                | 79.0       |         |                | 0.0        |         |                | 100.4                 |           |                |
|                    | 107.0              |            |         |                | 0.0        |         |                | 100.4                 |           |                |            |         |                | 0.0        |         |                | 100.4                 |           |                |
|                    | 115.0              |            |         |                | 0.0        |         |                | 100.4                 |           |                |            |         |                | 0.0        |         |                | 100.4                 |           |                |
|                    |                    |            |         |                | 3.0        |         |                | 97.5                  |           |                |            |         |                | 0.0        |         |                | 100.4                 |           |                |
|                    |                    |            |         |                | 0.0        |         |                | 100.4                 |           |                |            |         |                | 0.0        |         |                | 100.4                 |           |                |
| 1.0                | 439.0              | 370.1      | 11.4    |                | 1.0        | 0.3     | 0.2            | 100.3                 | 100.5     | 0.1            | 351.0      | 330.6   | 11.5           | 0.0        | 0.3     | 0.2            | 100.6                 | 100.5     | 0.1            |
|                    | 364.0              |            |         |                | 0.0        |         |                | 100.6                 |           |                | 353.0      |         |                | 0.0        |         |                | 100.6                 |           |                |
|                    | 361.0              |            |         |                | 0.0        |         |                | 100.6                 |           |                | 366.0      |         |                | 2.0        |         |                | 100.0                 |           |                |
|                    | 387.0              |            |         |                | 0.0        |         |                | 100.6                 |           |                | 319.0      |         |                | 1.0        |         |                | 100.3                 |           |                |
|                    | 418.0              |            |         |                | 0.0        |         |                | 100.6                 |           |                | 355.0      |         |                | 0.0        |         |                | 100.6                 |           |                |
|                    | 316.0              |            |         |                | 0.0        |         |                | 100.6                 |           |                | 325.0      |         |                | 0.0        |         |                | 100.6                 |           |                |
|                    | 337.0              |            |         |                | 1.0        |         |                | 100.3                 |           |                | 308.0      |         |                | 0.0        |         |                | 100.6                 |           |                |
|                    | 359.0              |            |         |                | 2.0        |         |                | 100.6                 |           |                | 268.0      |         |                | 0.0        |         |                | 100.6                 |           |                |
|                    | 359.0              |            |         |                | 0.0        |         |                | 100.1                 |           |                |            |         |                | 0.0        |         |                | 100.6                 |           |                |
|                    | 361.0              |            |         |                | 0.0        |         |                | 100.6                 |           |                |            |         |                | 1.0        |         |                | 100.3                 |           |                |
|                    |                    |            |         |                | 0.0        |         |                | 100.6                 |           |                |            |         |                | 0.0        |         |                | 100.6                 |           |                |
|                    |                    |            |         |                | 0.0        |         |                | 100.6                 |           |                |            |         |                | 0.0        |         |                | 100.6                 |           |                |
| 2.0                | 494.0              | 376.1      | 17.1    |                | 0.0        | 0.2     | 0.1            | 100.4                 | 100.4     | 0.0            | 468.0      | 373.5   | 30.3           | 0.0        | 0.3     | 0.2            | 100.4                 | 100.3     | 0.1            |
|                    | 422.0              |            |         |                | 0.0        |         |                | 100.4                 |           |                | 461.0      |         |                | 0.0        |         |                | 100.4                 |           |                |
|                    | 354.0              |            |         |                | 0.0        |         |                | 100.4                 |           |                | 437.0      |         |                | 1.0        |         |                | 100.1                 |           |                |
|                    | 352.0              |            |         |                | 0.0        |         |                | 100.4                 |           |                | 341.0      |         |                | 2.0        |         |                | 99.9                  |           |                |
|                    | 383.0              |            |         |                | 0.0        |         |                | 100.4                 |           |                | 397.0      |         |                | 0.0        |         |                | 100.4                 |           |                |
|                    | 327.0              |            |         |                | 0.0        |         |                | 100.4                 |           |                | 376.0      |         |                | 0.0        |         |                | 100.4                 |           |                |
|                    | 305.0              |            |         |                | 0.0        |         |                | 100.4                 |           |                | 235.0      |         |                | 0.0        |         |                | 100.4                 |           |                |
|                    | 344.0              |            |         |                | 0.0        |         |                | 100.4                 |           |                | 273.0      |         |                | 0.0        |         |                | 100.4                 |           |                |
|                    | 399.0              |            |         |                | 1.0        |         |                | 100.1                 |           |                |            |         |                | 1.0        |         |                | 100.1                 |           |                |
|                    | 381.0              |            |         |                | 0.0        |         |                | 100.4                 |           |                |            |         |                | 0.0        |         |                | 100.4                 |           |                |
|                    |                    |            |         |                | 0.0        |         |                | 100.4                 |           |                |            |         |                | 0.0        |         |                | 100.4                 |           |                |
|                    |                    |            |         |                | 1.0        |         |                | 100.1                 |           |                |            |         |                | 0.0        |         |                | 100.4                 |           |                |
| 5.0                | 115.0              | 108.9      | 4.8     |                | 0.0        | 0.2     | 0.1            | 100.1                 | 99.9      | 0.1            | 124.0      | 107.9   | 10.1           | 0.0        | 0.1     | 0.1            | 100.1                 | 100.0     | 0.1            |
|                    | 131.0              |            |         |                | 0.0        |         |                | 100.1                 |           |                | 130.0      |         |                | 0.0        |         |                | 100.1                 |           |                |
|                    | 102.0              |            |         |                | 0.0        |         |                | 100.1                 |           |                | 117.0      |         |                | 0.0        |         |                | 100.1                 |           |                |
|                    | 129.0              |            |         |                | 1.0        |         |                | 99.2                  |           |                | 111.0      |         |                | 0.0        |         |                | 100.1                 |           |                |
|                    | 121.0              |            |         |                | 0.0        |         |                | 100.1                 |           |                | 125.0      |         |                | 0.0        |         |                | 100.1                 |           |                |
|                    | 95.0               |            |         |                | 0.0        |         |                | 100.1                 |           |                | 124.0      |         |                | 0.0        |         |                | 100.1                 |           |                |
|                    | 95.0               |            |         |                | 1.0        |         |                | 99.2                  |           |                | 46.0       |         |                | 0.0        |         |                | 100.1                 |           |                |
|                    | 87.0               |            |         |                | 0.0        |         |                | 100.1                 |           |                | 86.0       |         |                | 0.0        |         |                | 100.1                 |           |                |
|                    | 112.0              |            |         |                | 0.0        |         |                | 100.1                 |           |                |            |         |                | 1.0        |         |                | 99.2                  |           |                |
|                    |                    |            |         |                | 0.0        |         |                | 100.1                 |           |                |            |         |                | 0.0        |         |                | 100.1                 |           |                |
|                    |                    |            |         |                | 0.0        |         |                | 100.1                 |           |                |            |         |                | 0.0        |         |                | 100.1                 |           |                |
|                    |                    |            |         |                | 0.0        |         |                | 100.1                 |           |                |            |         |                | 0.0        |         |                | 100.1                 |           |                |

| Mask<br>Type:<br>KN95 | Cycle 5    |         |                |            |         |                |                       |           |                | Cycle 6    |         |                |            |         |                |                       |           |                |
|-----------------------|------------|---------|----------------|------------|---------|----------------|-----------------------|-----------|----------------|------------|---------|----------------|------------|---------|----------------|-----------------------|-----------|----------------|
|                       | Control    |         |                | KD         |         |                |                       |           |                | Control    |         |                | KD         |         |                |                       |           |                |
|                       | Particle # | Average | Standard error | Particle # | Average | Standard error | FE (Norm. to cycle 0) | Average % | Standard error | Particle # | Average | Standard error | Particle # | Average | Standard error | FE (Norm. to cycle 0) | Average % | Standard error |
| 0.3                   | 16031.0    | 15712.8 | 96.2           | 12.0       | 32.0    | 2.9            | 100.8                 | 100.7     | 0.0            | 10484.0    | 10664.2 | 155.7          | 14.0       | 20.0    | 6.0            | 100.8                 | 100.7     | 0.1            |
|                       | 15957.0    |         |                | 42.0       |         |                | 100.6                 |           |                | 10891.0    |         |                | 16.0       |         |                | 100.8                 |           |                |
|                       | 15718.0    |         |                | 33.0       |         |                | 100.7                 |           |                | 11238.0    |         |                | 13.0       |         |                | 100.8                 |           |                |
|                       | 15446.0    |         |                | 28.0       |         |                | 100.7                 |           |                | 10693.0    |         |                | 28.0       |         |                | 100.6                 |           |                |
|                       | 15570.0    |         |                | 30.0       |         |                | 100.7                 |           |                | 10566.0    |         |                | 5.0        |         |                | 100.9                 |           |                |
|                       | 15555.0    |         |                | 39.0       |         |                | 100.7                 |           |                | 10113.0    |         |                | 1.0        |         |                | 100.9                 |           |                |
|                       |            |         |                | 39.0       |         |                | 100.7                 |           |                |            |         |                | 4.0        |         |                | 100.9                 |           |                |
|                       |            |         |                | 30.0       |         |                | 100.7                 |           |                |            |         |                | 9.0        |         |                | 100.8                 |           |                |
|                       |            |         |                | 37.0       |         |                | 100.7                 |           |                |            |         |                | 6.0        |         |                | 100.9                 |           |                |
|                       |            |         |                | 31.0       |         |                | 100.7                 |           |                |            |         |                | 61.0       |         |                | 100.3                 |           |                |
|                       |            |         |                | 16.0       |         |                | 100.8                 |           |                |            |         |                | 21.0       |         |                | 100.7                 |           |                |
|                       |            |         |                | 47.0       |         |                | 100.6                 |           |                |            |         |                | 62.0       |         |                | 100.3                 |           |                |
|                       | 0.5        |         |                | 1181.0     |         |                | 1210.7                |           |                | 24.9       |         |                | 0.0        |         |                | 0.9                   |           |                |
| 1170.0                |            | 1.0     | 100.5          | 1493.0     | 0.0     | 100.6          |                       |           |                |            |         |                |            |         |                |                       |           |                |
| 1167.0                |            | 0.0     | 100.6          | 1401.0     | 1.0     | 100.5          |                       |           |                |            |         |                |            |         |                |                       |           |                |
| 1227.0                |            | 2.0     | 100.4          | 1357.0     | 3.0     | 100.4          |                       |           |                |            |         |                |            |         |                |                       |           |                |
| 1327.0                |            | 1.0     | 100.5          | 1345.0     | 0.0     | 100.6          |                       |           |                |            |         |                |            |         |                |                       |           |                |
| 1192.0                |            | 1.0     | 100.5          | 1187.0     | 0.0     | 100.6          |                       |           |                |            |         |                |            |         |                |                       |           |                |
|                       |            | 1.0     | 100.5          |            | 0.0     | 100.6          |                       |           |                |            |         |                |            |         |                |                       |           |                |
|                       |            | 0.0     | 100.6          |            | 3.0     | 100.4          |                       |           |                |            |         |                |            |         |                |                       |           |                |
|                       |            | 1.0     | 100.5          |            | 1.0     | 100.5          |                       |           |                |            |         |                |            |         |                |                       |           |                |
|                       |            | 1.0     | 100.5          |            | 10.0    | 99.9           |                       |           |                |            |         |                |            |         |                |                       |           |                |
|                       |            | 2.0     | 100.4          |            | 1.0     | 100.5          |                       |           |                |            |         |                |            |         |                |                       |           |                |
|                       |            | 1.0     | 100.5          |            | 14.0    | 99.6           |                       |           |                |            |         |                |            |         |                |                       |           |                |
| 0.7                   |            | 83.0    | 94.2           | 5.2        | 0.0     | 0.3            |                       | 0.1       | 100.4          |            | 100.0   | 0.2            | 104.0      | 102.8   | 3.1            |                       | 0.0       | 0.3            |
|                       | 84.0       | 0.0     |                |            | 100.4   |                | 99.0                  |           | 0.0            | 100.4      |         |                |            |         |                |                       |           |                |
|                       | 86.0       | 0.0     |                |            | 100.4   |                | 112.0                 |           | 0.0            | 100.4      |         |                |            |         |                |                       |           |                |
|                       | 100.0      | 1.0     |                |            | 99.3    |                | 110.0                 |           | 1.0            | 99.4       |         |                |            |         |                |                       |           |                |
|                       | 116.0      | 1.0     |                |            | 99.3    |                | 91.0                  |           | 0.0            | 100.4      |         |                |            |         |                |                       |           |                |
|                       | 96.0       | 0.0     |                |            | 100.4   |                | 101.0                 |           | 0.0            | 100.4      |         |                |            |         |                |                       |           |                |
|                       |            | 0.0     |                |            | 100.4   |                |                       |           | 0.0            | 100.4      |         |                |            |         |                |                       |           |                |
|                       |            | 1.0     |                |            | 99.3    |                |                       |           | 0.0            | 100.4      |         |                |            |         |                |                       |           |                |
|                       |            | 0.0     |                |            | 100.4   |                |                       |           | 0.0            | 100.4      |         |                |            |         |                |                       |           |                |
|                       |            | 1.0     |                |            | 99.3    |                |                       |           | 3.0            | 97.5       |         |                |            |         |                |                       |           |                |
|                       |            | 0.0     |                |            | 100.4   |                |                       |           | 0.0            | 100.4      |         |                |            |         |                |                       |           |                |
|                       |            | 0.0     |                |            | 100.4   |                |                       |           | 0.0            | 100.4      |         |                |            |         |                |                       |           |                |
|                       | 1.0        | 313.0   |                |            | 332.5   |                | 14.3                  |           | 0.0            | 0.3        |         |                | 0.1        |         |                | 100.6                 | 100.5     |                |
| 313.0                 |            | 0.0     | 100.6          | 367.0      |         | 1.0            |                       | 100.3     |                |            |         |                |            |         |                |                       |           |                |
| 321.0                 |            | 0.0     | 100.6          | 327.0      |         | 0.0            |                       | 100.6     |                |            |         |                |            |         |                |                       |           |                |
| 297.0                 |            | 1.0     | 100.3          | 316.0      |         | 1.0            |                       | 100.3     |                |            |         |                |            |         |                |                       |           |                |
| 364.0                 |            | 0.0     | 100.6          | 295.0      |         | 0.0            |                       | 100.6     |                |            |         |                |            |         |                |                       |           |                |
| 387.0                 |            | 0.0     | 100.6          | 311.0      |         | 0.0            |                       | 100.6     |                |            |         |                |            |         |                |                       |           |                |
|                       |            | 1.0     | 100.3          |            |         | 0.0            |                       | 100.6     |                |            |         |                |            |         |                |                       |           |                |
|                       |            | 0.0     | 100.6          |            |         | 1.0            |                       | 100.3     |                |            |         |                |            |         |                |                       |           |                |
|                       |            | 0.0     | 100.6          |            |         | 0.0            |                       | 100.6     |                |            |         |                |            |         |                |                       |           |                |
|                       |            | 0.0     | 100.6          |            |         | 0.0            |                       | 100.6     |                |            |         |                |            |         |                |                       |           |                |
|                       |            | 0.0     | 100.6          |            |         | 0.0            |                       | 100.6     |                |            |         |                |            |         |                |                       |           |                |
|                       |            | 0.0     | 100.6          |            |         | 0.0            |                       | 100.6     |                |            |         |                |            |         |                |                       |           |                |
| 2.0                   |            | 256.0   | 266.8          | 16.2       |         | 0.0            |                       | 0.2       | 0.1            |            | 100.4   | 100.3          |            | 0.0     | 200.0          | 201.2                 |           | 11.8           |
|                       | 224.0      | 0.0     |                |            | 100.4   | 244.0          | 0.0                   |           |                | 100.4      |         |                |            |         |                |                       |           |                |
|                       | 260.0      | 0.0     |                |            | 100.4   | 212.0          | 0.0                   |           |                | 100.4      |         |                |            |         |                |                       |           |                |
|                       | 235.0      | 1.0     |                |            | 100.0   | 201.0          | 1.0                   |           |                | 99.9       |         |                |            |         |                |                       |           |                |
|                       | 296.0      | 0.0     |                |            | 100.4   | 196.0          | 0.0                   |           |                | 100.4      |         |                |            |         |                |                       |           |                |
|                       | 330.0      | 0.0     |                |            | 100.4   | 154.0          | 0.0                   |           |                | 100.4      |         |                |            |         |                |                       |           |                |
|                       |            | 0.0     |                |            | 100.4   |                | 0.0                   |           |                | 100.4      |         |                |            |         |                |                       |           |                |
|                       |            | 0.0     |                |            | 100.4   |                | 1.0                   |           |                | 99.9       |         |                |            |         |                |                       |           |                |
|                       |            | 0.0     |                |            | 100.4   |                | 0.0                   |           |                | 100.4      |         |                |            |         |                |                       |           |                |
|                       |            | 1.0     |                |            | 100.0   |                | 0.0                   |           |                | 100.4      |         |                |            |         |                |                       |           |                |
|                       |            | 0.0     |                |            | 100.4   |                | 1.0                   |           |                | 99.9       |         |                |            |         |                |                       |           |                |
|                       |            | 0.0     |                |            | 100.4   |                | 0.0                   |           |                | 100.4      |         |                |            |         |                |                       |           |                |
|                       | 5.0        | 47.0    |                |            | 52.8    | 4.5            | 0.0                   |           |                | 0.1        | 0.1     |                | 100.1      |         | 99.9           |                       | 0.2       |                |
| 48.0                  |            | 0.0     | 100.1          | 20.0       |         |                | 0.0                   | 100.1     |                |            |         |                |            |         |                |                       |           |                |
| 36.0                  |            | 0.0     | 100.1          | 24.0       |         |                | 0.0                   | 100.1     |                |            |         |                |            |         |                |                       |           |                |
| 63.0                  |            | 0.0     | 100.1          | 23.0       |         |                | 0.0                   | 100.1     |                |            |         |                |            |         |                |                       |           |                |
| 61.0                  |            | 0.0     | 100.1          | 29.0       |         |                | 0.0                   | 100.1     |                |            |         |                |            |         |                |                       |           |                |
| 62.0                  |            | 0.0     | 100.1          | 28.0       |         |                | 0.0                   | 100.1     |                |            |         |                |            |         |                |                       |           |                |
|                       |            | 0.0     | 100.1          |            |         |                | 0.0                   | 100.1     |                |            |         |                |            |         |                |                       |           |                |
|                       |            | 0.0     | 100.1          |            |         |                | 0.0                   | 100.1     |                |            |         |                |            |         |                |                       |           |                |
|                       |            | 0.0     | 100.1          |            |         |                | 0.0                   | 100.1     |                |            |         |                |            |         |                |                       |           |                |
|                       |            | 0.0     | 100.1          |            |         |                | 0.0                   | 100.1     |                |            |         |                |            |         |                |                       |           |                |
|                       |            | 1.0     | 98.2           |            |         |                | 0.0                   | 100.1     |                |            |         |                |            |         |                |                       |           |                |
|                       |            | 0.0     | 100.1          |            |         |                | 1.0                   | 96.1      |                |            |         |                |            |         |                |                       |           |                |
|                       |            | 0.0     | 100.1          |            |         |                | 0.0                   | 100.1     |                |            |         |                |            |         |                |                       |           |                |

| Mask<br>Type:<br>KN95 | Cycle 7                  |               |         |                    |               |         |                   |                          |              |                    | Cycle 8       |         |                   |               |         |                   |                          |              |                    |       |
|-----------------------|--------------------------|---------------|---------|--------------------|---------------|---------|-------------------|--------------------------|--------------|--------------------|---------------|---------|-------------------|---------------|---------|-------------------|--------------------------|--------------|--------------------|-------|
|                       | Control                  |               |         | KD                 |               |         |                   |                          |              |                    | Control       |         |                   | KD            |         |                   |                          |              |                    |       |
|                       | Particle<br>Size<br>(uM) | Particle<br># | Average | Standar<br>d error | Particle<br># | Average | Standrad<br>error | FE (Norm.<br>to cycle 0) | Average<br>% | Standar<br>d error | Particle<br># | Average | Standrad<br>error | Particle<br># | Average | Standrad<br>error | FE (Norm.<br>to cycle 0) | Average<br>% | Standar<br>d error |       |
| 0.3                   | 21301.0                  | 22187.8       | 198.0   |                    | 28.0          | 20.6    | 3.5               | 100.8                    | 100.8        | 0.0                | 45828.0       | 45457.2 | 285.5             | 71.0          | 30.8    | 6.0               | 100.8                    | 100.8        | 0.0                |       |
|                       | 22082.0                  |               |         | 36.0               | 100.7         |         |                   | 45720.0                  |              |                    | 37.0          |         |                   | 100.8         |         |                   |                          |              |                    |       |
|                       | 22616.0                  |               |         | 42.0               | 100.7         |         |                   | 45812.0                  |              |                    | 13.0          |         |                   | 100.9         |         |                   |                          |              |                    |       |
|                       | 22503.0                  |               |         | 12.0               | 100.9         |         |                   | 45329.0                  |              |                    | 32.0          |         |                   | 100.8         |         |                   |                          |              |                    |       |
|                       | 22493.0                  |               |         | 1.0                | 100.9         |         |                   | 45956.0                  |              |                    | 35.0          |         |                   | 100.8         |         |                   |                          |              |                    |       |
|                       | 22132.0                  |               |         | 11.0               | 100.9         |         |                   | 44098.0                  |              |                    | 42.0          |         |                   | 100.8         |         |                   |                          |              |                    |       |
|                       |                          |               |         | 33.0               | 100.8         |         |                   |                          |              |                    | 33.0          |         |                   | 100.8         |         |                   |                          |              |                    |       |
|                       |                          |               |         | 10.0               | 100.9         |         |                   |                          |              |                    | 61.0          |         |                   | 100.8         |         |                   |                          |              |                    |       |
|                       |                          |               |         | 18.0               | 100.8         |         |                   |                          |              |                    | 11.0          |         |                   | 100.9         |         |                   |                          |              |                    |       |
|                       |                          |               |         | 19.0               | 100.8         |         |                   |                          |              |                    | 23.0          |         |                   | 100.9         |         |                   |                          |              |                    |       |
|                       |                          |               |         | 22.0               | 100.8         |         |                   |                          |              |                    | 4.0           |         |                   | 100.9         |         |                   |                          |              |                    |       |
|                       |                          |               |         | 15.0               | 100.8         |         |                   |                          |              |                    | 7.0           |         |                   | 100.9         |         |                   |                          |              |                    |       |
|                       | 0.5                      |               |         | 1677.0             | 1646.2        |         |                   | 18.5                     |              |                    | 0.0           |         |                   | 0.9           |         |                   | 0.4                      |              |                    | 100.6 |
| 1567.0                |                          | 1.0           | 100.5   | 3513.0             |               | 3.0     | 100.5             |                          |              |                    |               |         |                   |               |         |                   |                          |              |                    |       |
| 1663.0                |                          | 1.0           | 100.5   | 3899.0             |               | 0.0     | 100.6             |                          |              |                    |               |         |                   |               |         |                   |                          |              |                    |       |
| 1694.0                |                          | 0.0           | 100.6   | 3981.0             |               | 1.0     | 100.6             |                          |              |                    |               |         |                   |               |         |                   |                          |              |                    |       |
| 1652.0                |                          | 0.0           | 100.6   | 3940.0             |               | 0.0     | 100.6             |                          |              |                    |               |         |                   |               |         |                   |                          |              |                    |       |
| 1624.0                |                          | 0.0           | 100.6   | 3727.0             |               | 4.0     | 100.5             |                          |              |                    |               |         |                   |               |         |                   |                          |              |                    |       |
|                       |                          | 4.0           | 100.4   |                    |               | 0.0     | 100.6             |                          |              |                    |               |         |                   |               |         |                   |                          |              |                    |       |
|                       |                          | 3.0           | 100.4   |                    |               | 1.0     | 100.6             |                          |              |                    |               |         |                   |               |         |                   |                          |              |                    |       |
|                       |                          | 1.0           | 100.5   |                    |               | 0.0     | 100.6             |                          |              |                    |               |         |                   |               |         |                   |                          |              |                    |       |
|                       |                          | 0.0           | 100.6   |                    |               | 0.0     | 100.6             |                          |              |                    |               |         |                   |               |         |                   |                          |              |                    |       |
|                       |                          | 1.0           | 100.5   |                    |               | 5.0     | 100.5             |                          |              |                    |               |         |                   |               |         |                   |                          |              |                    |       |
|                       |                          | 0.0           | 100.6   |                    |               | 6.0     | 100.4             |                          |              |                    |               |         |                   |               |         |                   |                          |              |                    |       |
| 0.7                   |                          | 104.0         | 120.3   | 6.4                |               | 0.0     | 0.1               |                          | 0.1          | 100.4              | 100.3         | 0.1     | 183.0             |               | 187.5   | 13.9              |                          | 0.0          | 0.3                | 0.2   |
|                       | 101.0                    | 0.0           |         |                    | 100.4         | 160.0   |                   | 0.0                      |              | 100.4              |               |         |                   |               |         |                   |                          |              |                    |       |
|                       | 126.0                    | 0.0           |         |                    | 100.4         | 236.0   |                   | 2.0                      |              | 99.3               |               |         |                   |               |         |                   |                          |              |                    |       |
|                       | 143.0                    | 0.0           |         |                    | 100.4         | 223.0   |                   | 0.0                      |              | 100.4              |               |         |                   |               |         |                   |                          |              |                    |       |
|                       | 124.0                    | 0.0           |         |                    | 100.4         | 166.0   |                   | 0.0                      |              | 100.4              |               |         |                   |               |         |                   |                          |              |                    |       |
|                       | 124.0                    | 0.0           |         |                    | 100.4         | 157.0   |                   | 0.0                      |              | 100.4              |               |         |                   |               |         |                   |                          |              |                    |       |
|                       |                          | 1.0           |         |                    | 99.6          |         |                   | 0.0                      |              | 100.4              |               |         |                   |               |         |                   |                          |              |                    |       |
|                       |                          | 0.0           |         |                    | 100.4         |         |                   | 0.0                      |              | 100.4              |               |         |                   |               |         |                   |                          |              |                    |       |
|                       |                          | 0.0           |         |                    | 100.4         |         |                   | 0.0                      |              | 100.4              |               |         |                   |               |         |                   |                          |              |                    |       |
|                       |                          | 0.0           |         |                    | 100.4         |         |                   | 2.0                      |              | 99.3               |               |         |                   |               |         |                   |                          |              |                    |       |
|                       |                          | 0.0           |         |                    | 100.4         |         |                   | 0.0                      |              | 100.4              |               |         |                   |               |         |                   |                          |              |                    |       |
|                       |                          | 0.0           |         |                    | 100.4         |         |                   | 0.0                      |              | 100.4              |               |         |                   |               |         |                   |                          |              |                    |       |
|                       |                          | 0.0           |         |                    | 100.4         |         |                   | 0.0                      |              | 100.4              |               |         |                   |               |         |                   |                          |              |                    |       |
| 1.0                   | 380.0                    | 386.2         | 4.5     | 0.0                | 0.3           | 0.2     | 100.6             | 100.5                    | 0.0          | 482.0              | 514.8         | 15.1    | 0.0               | 0.4           | 0.3     | 100.6             | 100.5                    | 0.1          |                    |       |
|                       | 385.0                    |               |         | 1.0                |               |         | 100.3             |                          |              | 488.0              |               |         | 1.0               |               |         | 100.4             |                          |              |                    |       |
|                       | 397.0                    |               |         | 2.0                |               |         | 100.1             |                          |              | 575.0              |               |         | 0.0               |               |         | 100.6             |                          |              |                    |       |
|                       | 390.0                    |               |         | 0.0                |               |         | 100.6             |                          |              | 534.0              |               |         | 0.0               |               |         | 100.6             |                          |              |                    |       |
|                       | 397.0                    |               |         | 0.0                |               |         | 100.6             |                          |              | 526.0              |               |         | 0.0               |               |         | 100.6             |                          |              |                    |       |
|                       | 368.0                    |               |         | 0.0                |               |         | 100.6             |                          |              | 484.0              |               |         | 0.0               |               |         | 100.6             |                          |              |                    |       |
|                       |                          |               |         | 0.0                |               |         | 100.6             |                          |              |                    |               |         | 0.0               |               |         | 100.6             |                          |              |                    |       |
|                       |                          |               |         | 0.0                |               |         | 100.6             |                          |              |                    |               |         | 0.0               |               |         | 100.6             |                          |              |                    |       |
|                       |                          |               |         | 0.0                |               |         | 100.6             |                          |              |                    |               |         | 1.0               |               |         | 100.4             |                          |              |                    |       |
|                       |                          |               |         | 0.0                |               |         | 100.6             |                          |              |                    |               |         | 3.0               |               |         | 100.0             |                          |              |                    |       |
|                       |                          |               |         | 0.0                |               |         | 100.6             |                          |              |                    |               |         | 0.0               |               |         | 100.6             |                          |              |                    |       |
|                       |                          |               |         | 0.0                |               |         | 100.6             |                          |              |                    |               |         | 0.0               |               |         | 100.6             |                          |              |                    |       |
|                       |                          |               |         | 0.0                |               |         | 100.6             |                          |              |                    |               |         | 0.0               |               |         | 100.6             |                          |              |                    |       |
| 2.0                   | 243.0                    | 270.0         | 9.4     | 0.0                | 0.1           | 0.1     | 100.4             | 100.4                    | 0.0          | 465.0              | 458.7         | 22.9    | 0.0               | 0.2           | 0.1     | 100.4             | 100.4                    | 0.0          |                    |       |
|                       | 278.0                    |               |         | 1.0                |               |         | 100.0             |                          |              | 524.0              |               |         | 0.0               |               |         | 100.4             |                          |              |                    |       |
|                       | 309.0                    |               |         | 0.0                |               |         | 100.4             |                          |              | 494.0              |               |         | 0.0               |               |         | 100.4             |                          |              |                    |       |
|                       | 274.0                    |               |         | 0.0                |               |         | 100.4             |                          |              | 473.0              |               |         | 1.0               |               |         | 100.2             |                          |              |                    |       |
|                       | 255.0                    |               |         | 0.0                |               |         | 100.4             |                          |              | 434.0              |               |         | 1.0               |               |         | 100.2             |                          |              |                    |       |
|                       | 261.0                    |               |         | 0.0                |               |         | 100.4             |                          |              | 362.0              |               |         | 0.0               |               |         | 100.4             |                          |              |                    |       |
|                       |                          |               |         | 0.0                |               |         | 100.4             |                          |              |                    |               |         | 0.0               |               |         | 100.4             |                          |              |                    |       |
|                       |                          |               |         | 0.0                |               |         | 100.4             |                          |              |                    |               |         | 0.0               |               |         | 100.4             |                          |              |                    |       |
|                       |                          |               |         | 0.0                |               |         | 100.4             |                          |              |                    |               |         | 0.0               |               |         | 100.4             |                          |              |                    |       |
|                       |                          |               |         | 0.0                |               |         | 100.4             |                          |              |                    |               |         | 0.0               |               |         | 100.4             |                          |              |                    |       |
|                       |                          |               |         | 0.0                |               |         | 100.4             |                          |              |                    |               |         | 0.0               |               |         | 100.4             |                          |              |                    |       |
|                       |                          |               |         | 0.0                |               |         | 100.4             |                          |              |                    |               |         | 0.0               |               |         | 100.4             |                          |              |                    |       |
|                       |                          |               |         | 0.0                |               |         | 100.4             |                          |              |                    |               |         | 0.0               |               |         | 100.4             |                          |              |                    |       |
| 5.0                   | 25.0                     | 30.8          | 2.7     | 0.0                | 0.0           | 0.0     | 100.1             | 100.1                    | 0.0          | 158.0              | 139.7         | 12.6    | 0.0               | 0.1           | 0.1     | 100.1             | 100.0                    | 0.1          |                    |       |
|                       | 33.0                     |               |         | 0.0                |               |         | 100.1             |                          |              | 176.0              |               |         | 0.0               |               |         | 100.1             |                          |              |                    |       |
|                       | 35.0                     |               |         | 0.0                |               |         | 100.1             |                          |              | 153.0              |               |         | 0.0               |               |         | 100.1             |                          |              |                    |       |
|                       | 41.0                     |               |         | 0.0                |               |         | 100.1             |                          |              | 143.0              |               |         | 0.0               |               |         | 100.1             |                          |              |                    |       |
|                       | 25.0                     |               |         | 0.0                |               |         | 100.1             |                          |              | 118.0              |               |         | 0.0               |               |         | 100.1             |                          |              |                    |       |
|                       | 26.0                     |               |         | 0.0                |               |         | 100.1             |                          |              | 90.0               |               |         | 0.0               |               |         | 100.1             |                          |              |                    |       |
|                       |                          |               |         | 0.0                |               |         | 100.1             |                          |              |                    |               |         | 0.0               |               |         | 100.1             |                          |              |                    |       |
|                       |                          |               |         | 0.0                |               |         | 100.1             |                          |              |                    |               |         | 0.0               |               |         | 100.1             |                          |              |                    |       |
|                       |                          |               |         | 0.0                |               |         | 100.1             |                          |              |                    |               |         | 1.0               |               |         | 99.4              |                          |              |                    |       |
|                       |                          |               |         | 0.0                |               |         | 100.1             |                          |              |                    |               |         | 0.0               |               |         | 100.1             |                          |              |                    |       |
|                       |                          |               |         | 0.0                |               |         | 100.1             |                          |              |                    |               |         | 0.0               |               |         | 100.1             |                          |              |                    |       |
|                       |                          |               |         | 0.0                |               |         | 100.1             |                          |              |                    |               |         | 0.0               |               |         | 100.1             |                          |              |                    |       |
|                       |                          |               |         | 0.0                |               |         | 100.1             |                          |              |                    |               |         | 0.0               |               |         | 100.1             |                          |              |                    |       |



**Supplementary Material 5:** The raw data of experimental uncertainties analysis.
